# Supplementary material for: Identifying key conservation threats to Alpine birds through expert knowledge
Source: PeerJ. 2016 Feb 29;4:e1723. doi: 10.7717/peerj.1723 (PMC4782807; doi:10.7717/peerj.1723)
Supplement: Supplemental Information 1 [file peerj-04-1723-s001.xlsx]

## Sheet: all_experts
Expert ID	Code	English_name	Latin_name	T1_abandon	T2_grazing	T3_forest	T4_urban	T5_leisure	T6_hunting	T7_energy	T8_mining	T9_fire	T10_climate
1	LM	Lammergeier	Gypaetus barbatus	0	0	0	1	3	1	2	0	0	0
1	EA	Golden Eagle	Aquila chrysaetos	1	0	0	0	1	0	1	0	0	0
1	BZ	Buzzard	Buteo buteo	0	0	0	0	0	0	0	0	0	0
1	SH	Sparrowhawk	Accipiter nisus	0	0	0	0	0	0	0	0	0	0
1	K	Kestrel	Falco tinnunculus	1	0	0	0	0	0	0	0	0	0
1	PE	Peregrine falcon	Falco peregrinus	0	0	0	0	1	0	0	0	0	0
1	BG	Black Grouse	Tetrao tetrix	3	2	1	2	3	1	0	0	0	1
1	PT	Ptarmigan	Lagopus muta	0	0	0	1	1	1	0	0	0	3
1	RP	Rock Partridge	Alectoris graeca	1	0	0	1	1	0	0	0	0	0
1	Q	Quail	Coturnix coturnix	0	0	0	0	0	0	0	0	0	0
1	CK	Cuckoo	Cuculus canorus	0	0	0	0	0	0	0	0	0	0
1	SI	Swift	Apus apus	0	0	0	0	0	0	0	0	0	0
1	AS	Alpine Swift	Apus melba	0	0	0	0	0	0	0	0	0	0
1	GS	Greater spotted Woodpecker	Dendrocopos major	0	0	1	0	0	0	0	0	0	0
1	G	Green Woodpecker	Picus viridus	0	0	1	0	0	0	0	0	0	0
1	S	Skylark	Alauda arvensis	1	0	0	0	0	0	0	0	0	0
1	HM	House Martin	Delichon urbica	0	0	0	0	0	0	0	0	0	0
1	CM	Crag Martin	Ptyonoprogne rupestris	0	0	0	0	0	0	0	0	0	0
1	WI	Water Pipit	Anthus spinoletta	1	0	0	0	0	0	0	0	0	0
1	TP	Tree Pipit	Anthus trivialis	2	0	0	0	0	0	0	0	0	0
1	PW	White Wagtail	Motacilla alba	0	0	0	0	0	0	0	0	0	0
1	GL	Grey Wagtail	Motacilla cinerea	0	0	0	0	0	0	0	0	0	0
1	WR	Wren	Troglodytes troglodytes	0	0	0	0	0	0	0	0	0	0
1	DI	Dipper	Cinclus cinclus	0	0	0	0	0	0	0	0	0	0
1	D	Dunnock	Prunella modularis	0	0	0	0	0	0	0	0	0	0
1	AA	Alpine Accentor	Prunella collaris	0	0	0	0	0	0	0	0	0	1
1	R	Robin	Erithacus rubecula	0	0	0	0	0	0	0	0	0	0
1	BX	Black Redstart	Phoenicurus ochruros	0	0	0	0	0	0	0	0	0	0
1	W	Wheatear	Oenanthe oenanthe	0	0	0	0	0	0	0	0	0	0
1	WH	Whinchat	Saxicola rubetra	0	3	0	0	0	0	0	0	0	0
1	RO	Rock Thrush	Monticola saxatilis	0	0	0	0	0	0	0	0	0	0
1	ST	Song Thrush	Turdus philomelos	0	0	0	0	0	0	0	0	0	0
1	M	Mistle Thrush	Turdus viscivorus	0	0	0	0	0	0	0	0	0	0
1	FF	Fieldfare	Turdus pilaris	0	0	0	0	0	0	0	0	0	0
1	B	Blackbird	Turdus merula	0	0	0	0	0	0	0	0	0	0
1	RZ	Ring Ouzel	Turdus torquatus	1	0	0	0	0	0	0	0	0	2
1	GW	Garden Warbler	Sylvia borin	0	0	0	0	0	0	0	0	0	0
1	BC	Blackcap	Sylvia atricapilla	0	0	0	0	0	0	0	0	0	0
1	LW	Lesser Whitethroat	Sylvia curruca	0	0	1	0	0	0	0	0	0	0
1	IW	Bonelliâ€™s Warbler	Phylloscopus bonelli	0	0	0	0	0	0	0	0	0	0
1	CC	Chiffchaff	Phylloscopos collybita	0	0	0	0	0	0	0	0	0	0
1	GC	Goldcrest	Regulus regulus	0	0	0	0	0	0	0	0	0	0
1	FC	Firecrest	Regulus ignicapillus	0	0	0	0	0	0	0	0	0	0
1	CT	Coal Tit	Periparus ater	0	0	0	0	0	0	0	0	0	0
1	BT	Blue Tit	Cyanistes caeruleus	0	0	0	0	0	0	0	0	0	0
1	CI	Crested Tit	Lophophanes cristatus	0	0	0	0	0	0	0	0	0	0
1	WT	Willow Tit	Poeciles montanus	0	0	0	0	0	0	0	0	0	0
1	LT	Long-tailed Tit	Aegithalos caudatus	0	0	0	0	0	0	0	0	0	0
1	NH	Nuthatch	Sitta europeae	0	0	0	0	0	0	0	0	0	0
1	WA	Wallcreeper	Tichodroma muraria	0	0	0	0	0	0	0	0	0	0
1	TC	Treecreeper	Certhia familiaris	0	0	0	0	0	0	0	0	0	0
1	RS	Red-backed Shrike	Lanius collurio	0	0	0	0	0	0	0	0	0	0
1	J	Jay	Garrulus glandarius	0	0	0	0	0	0	0	0	0	0
1	NC	Nutcracker	Nucifraga caryocatactes	0	0	0	0	0	0	0	0	0	0
1	CG	Chough	Pyrrhocorax pyrrhocorax	1	0	0	0	0	0	0	0	0	0
1	AC	Alpine Chough	Pyrrhocorax gracilis	0	0	0	0	0	0	0	0	0	0
1	C	Crow	Corvus corone	0	0	0	0	0	0	0	0	0	0
1	RN	Raven	Corvus corax	0	0	0	0	0	0	0	0	0	0
1	MN	Snowfinch	Montifringilla nivalis	0	0	0	0	0	0	0	0	0	3
1	CH	Chaffinch	Fringella coelebs	0	0	0	0	0	0	0	0	0	0
1	LI	Linnet	Carduelis cannabina	1	0	0	0	0	0	0	0	0	0
1	LR	Redpoll	Carduelis flammea	0	0	0	0	0	0	0	0	0	0
1	GO	Goldfinch	Carduelis carduelis	0	0	0	0	0	0	0	0	0	0
1	SK	Siskin	Carduelis spinus	0	0	0	0	0	0	0	0	0	0
1	CF	Citril Finch	Carduelis citrinella	1	0	0	0	0	0	0	0	0	0
1	BF	Bullfinch	Pyrrhula pyrrhula	0	0	0	0	0	0	0	0	0	0
1	CR	Crossbill	Loxia curvirostra	0	0	0	0	0	0	0	0	0	0
1	Y	Yellowhammer	Emberiza citrinella	0	0	0	0	0	0	0	0	0	0
1	RU	Rock Bunting	Emberiza cia	0	0	0	0	0	0	0	0	0	0
2	LM	Lammergeier	Gypaetus barbatus	2	0	0	3	3	3	3	2	0	1
2	EA	Golden Eagle	Aquila chrysaetos	1	1	0	3	3	3	3	2	0	1
2	BZ	Buzzard	Buteo buteo	0	1	1	1	1	1	3	0	1	1
2	SH	Sparrowhawk	Accipiter nisus	0	1	2	2	2	1	3	0	2	1
2	K	Kestrel	Falco tinnunculus	2	1	0	1	2	1	3	2	0	1
2	PE	Peregrine falcon	Falco peregrinus	0	0	0	2	3	2	3	3	0	1
2	BG	Black Grouse	Tetrao tetrix	2	2	2	3	3	3	1	0	1	2
2	PT	Ptarmigan	Lagopus muta	1	2	0	3	3	3	1	0	0	3
2	RP	Rock Partridge	Alectoris graeca	1	2	0	3	3	3	1	3	0	3
2	Q	Quail	Coturnix coturnix	3	3	0	1	2	3	2	0	0	2
2	CK	Cuckoo	Cuculus canorus	0	0	0	0	1	0	0	0	0	2
2	SI	Swift	Apus apus	0	0	0	0	2	0	3	2	0	2
2	AS	Alpine Swift	Apus melba	0	0	0	0	3	0	3	3	0	2
2	GS	Greater spotted Woodpecker	Dendrocopos major	0	0	2	0	0	0	0	0	1	1
2	G	Green Woodpecker	Picus viridis	0	2	3	0	0	0	0	0	2	1
2	S	Skylark	Alauda arvensis	3	3	0	2	0	2	0	0	0	1
2	HM	House Martin	Delichon urbicum	0	0	0	0	1	0	2	1	0	1
2	CM	Crag Martin	Ptyonoprogne rupestris	0	0	0	0	2	0	2	3	0	1
2	WI	Water Pipit	Anthus spinoletta	1	2	0	1	0	0	0	0	0	2
2	TP	Tree Pipit	Anthus trivialis	0	1	0	0	0	1	0	0	0	1
2	PW	White Wagtail	Motacilla alba	3	2	0	0	0	0	1	0	0	1
2	GL	Grey Wagtail	Motacilla cinerea	2	1	0	0	0	0	2	0	0	1
2	WR	Wren	Troglodytes troglodytes	0	0	1	0	0	0	0	0	1	2
2	DI	Dipper	Cinclus cinclus	0	2	0	2	1	0	3	0	0	2
2	D	Dunnock	Prunella modularis	0	0	1	0	0	0	0	0	1	1
2	AA	Alpine Accentor	Prunella collaris	0	0	0	0	2	0	0	0	0	3
2	R	Robin	Erithacus rubecula	0	0	1	0	0	1	0	0	1	1
2	BX	Black Redstart	Phoenicurus ochruros	1	1	0	0	0	0	0	0	0	1
2	W	Wheatear	Oenanthe oenanthe	1	2	0	0	1	0	0	0	0	2
2	WH	Whinchat	Saxicola rubetra	3	3	0	2	1	0	1	0	0	2
2	RO	Rock Thrush	Monticola saxatilis	2	2	1	0	1	0	0	1	0	2
2	ST	Song Thrush	Turdus philomelos	0	0	2	0	0	1	0	0	1	1
2	M	Mistle Thrush	Turdus viscivorus	2	1	2	1	0	1	0	0	1	1
2	FF	Fieldfare	Turdus pilaris	1	1	2	1	0	1	0	0	1	1
2	B	Blackbird	Turdus merula	0	0	0	0	0	1	0	0	0	1
2	RZ	Ring Ouzel	Turdus torquatus	1	1	0	1	1	0	0	0	0	2
2	GW	Garden Warbler	Sylvia borin	0	0	2	0	0	0	1	0	0	1
2	BC	Blackcap	Sylvia atricapilla	0	0	0	0	0	0	0	0	0	1
2	LW	Lesser Whitethroat	Sylvia curruca	1	1	1	0	0	0	0	0	0	1
2	IW	Bonelliâ€šÃ„Ã´s Warbler	Phylloscopus bonelli	0	0	2	0	0	0	0	0	0	1
2	CC	Chiffchaff	Phylloscopus collybita	0	0	1	0	0	0	0	0	0	1
2	GC	Goldcrest	Regulus regulus	0	0	2	1	0	0	0	0	1	3
2	FC	Firecrest	Regulus ignicapilla	0	0	2	0	0	0	0	0	1	3
2	CT	Coal Tit	Periparus ater	0	0	1	0	0	0	0	0	1	1
2	BT	Blue Tit	Cyanistes caeruleus	0	0	2	0	0	0	0	0	1	1
2	CI	Crested Tit	Lophophanes cristatus	0	0	3	0	0	0	0	0	1	1
2	WT	Willow Tit	Poeciles montanus	0	0	1	0	0	0	0	0	0	1
2	LT	Long-tailed Tit	Aegithalos caudatus	0	0	2	0	0	0	0	0	1	1
2	NH	Nuthatch	Sitta europaea	0	0	3	0	0	0	0	0	2	1
2	WA	Wallcreeper	Tichodroma muraria	0	0	0	0	3	0	0	3	0	1
2	TC	Treecreeper	Certhia familiaris	0	0	3	0	0	0	0	0	1	2
2	RS	Red-backed Shrike	Lanius collurio	3	2	0	2	0	0	0	0	2	2
2	J	Jay	Garrulus glandarius	0	0	2	0	0	0	0	0	1	1
2	NC	Nutcracker	Nucifraga caryocatactes	0	0	2	0	0	0	0	0	1	1
2	CG	Chough	Pyrrhocorax pyrrhocorax	0	0	0	0	3	0	2	0	0	1
2	AC	Alpine Chough	Pyrrhocorax graculus	0	0	0	0	3	0	2	0	0	1
2	C	Crow	Corvus corone	0	0	1	0	0	1	1	0	0	1
2	RN	Raven	Corvus corax	0	0	0	0	3	0	2	2	0	1
2	MN	Snowfinch	Montifringilla nivalis	0	1	0	1	2	0	0	0	0	3
2	CH	Chaffinch	Fringella coelebs	0	0	0	0	0	1	0	0	0	1
2	LI	Linnet	Carduelis cannabina	1	2	0	1	0	0	0	0	1	2
2	LR	Redpoll	Carduelis flammea	1	1	0	0	0	0	0	0	0	1
2	GO	Goldfinch	Carduelis carduelis	2	1	0	0	0	1	0	0	0	1
2	SK	Siskin	Carduelis spinus	0	0	3	0	1	1	0	0	1	1
2	CF	Citril Finch	Carduelis citrinella	2	2	0	1	0	0	0	0	0	3
2	BF	Bullfinch	Pyrrhula pyrrhula	0	0	2	0	0	0	0	0	1	1
2	CR	Crossbill	Loxia curvirostra	0	0	3	0	0	1	0	0	1	2
2	Y	Yellowhammer	Emberiza citrinella	3	3	0	2	1	0	0	0	1	2
2	RU	Rock Bunting	Emberiza cia	0	0	0	0	0	0	0	3	0	2
3	LM	Lammergeier	Gypaetus barbatus	1	0	1	3	3	3	3	1	1	0
3	EA	Golden Eagle	Aquila chrysaetos	1	0	2	3	3	3	3	1	1	0
3	BZ	Buzzard	Buteo buteo	1	0	2	2	1	3	1	1	2	0
3	SH	Sparrowhawk	Accipiter nisus	1	0	2	2	1	3	2	0	2	0
3	K	Kestrel	Falco tinnunculus	2	0	0	3	2	2	2	1	1	0
3	PE	Peregrine falcon	Falco peregrinus	1	0	0	2	3	2	2	1	1	0
3	BG	Black Grouse	Tetrao tetrix	2	2	0	3	3	2	1	1	1	2
3	PT	Ptarmigan	Lagopus muta	0	0	0	3	3	3	1	0	0	3
3	RP	Rock Partridge	Alectoris graeca	1	2	0	3	3	3	1	1	1	2
3	Q	Quail	Coturnix coturnix	2	3	0	3	3	3	1	0	2	1
3	CK	Cuckoo	Cuculus canorus	0	0	1	1	0	0	0	0	2	0
3	SI	Swift	Apus apus	0	0	0	1	0	0	0	0	0	0
3	AS	Alpine Swift	Apus melba	0	0	0	1	0	0	0	0	0	0
3	GS	Greater spotted Woodpecker	Dendrocopos major	0	0	2	1	0	1	0	0	2	0
3	G	Green Woodpecker	Picus viridus	0	0	2	1	0	1	0	0	2	0
3	S	Skylark	Alauda arvensis	2	3	0	3	3	3	0	1	2	0
3	HM	House Martin	Delichon urbica	0	0	0	1	0	0	0	0	0	0
3	CM	Crag Martin	Ptyonoprogne rupestris	0	0	0	1	1	0	0	0	0	0
3	WI	Water Pipit	Anthus spinoletta	1	2	0	1	0	0	0	0	1	2
3	TP	Tree Pipit	Anthus trivialis	2	2	0	1	0	0	0	0	1	0
3	PW	White Wagtail	Motacilla alba	1	0	0	1	0	0	1	0	0	0
3	GL	Grey Wagtail	Motacilla cinerea	1	0	0	1	0	0	1	0	0	0
3	WR	Wren	Troglodytes troglodytes	0	0	1	1	0	0	0	0	1	0
3	DI	Dipper	Cinclus cinclus	0	0	0	1	0	0	3	0	0	1
3	D	Dunnock	Prunella modularis	1	0	1	1	0	0	0	0	1	0
3	AA	Alpine Accentor	Prunella collaris	0	0	0	1	0	0	0	0	0	0
3	R	Robin	Erithacus rubecula	0	0	1	1	1	2	0	0	1	0
3	BX	Black Redstart	Phoenicurus ochruros	0	1	0	1	0	0	0	0	1	0
3	W	Wheatear	Oenanthe oenanthe	1	1	0	1	0	0	0	0	1	1
3	WH	Whinchat	Saxicola rubetra	2	1	0	1	0	0	0	0	1	0
3	RO	Rock Thrush	Monticola saxatilis	1	2	0	2	0	0	0	0	2	2
3	ST	Song Thrush	Turdus philomelos	0	0	1	1	2	3	0	0	1	0
3	M	Mistle Thrush	Turdus viscivorus	0	0	1	1	2	3	0	0	1	0
3	FF	Fieldfare	Turdus pilaris	1	0	1	1	2	3	0	0	1	0
3	B	Blackbird	Turdus merula	0	0	0	1	2	3	0	0	1	0
3	RZ	Ring Ouzel	Turdus torquatus	1	0	2	2	0	1	0	0	1	1
3	GW	Garden Warbler	Sylvia borin	0	0	2	1	0	0	0	0	1	1
3	BC	Blackcap	Sylvia atricapilla	0	0	1	1	0	0	0	0	1	0
3	LW	Lesser Whitethroat	Sylvia curruca	0	0	1	1	0	0	0	0	1	1
3	IW	Bonelli’s Warbler	Phylloscopus bonelli	0	0	1	1	0	0	0	0	1	0
3	CC	Chiffchaff	Phylloscopos collybita	0	0	1	1	0	0	0	0	1	0
3	GC	Goldcrest	Regulus regulus	0	0	1	1	0	1	0	0	1	0
3	FC	Firecrest	Regulus ignicapillus	0	0	1	1	0	1	0	0	1	0
3	CT	Coal Tit	Periparus ater	0	0	1	0	0	3	0	0	1	1
3	BT	Blue Tit	Cyanistes caeruleus	0	0	1	0	0	1	0	0	1	0
3	CI	Crested Tit	Lophophanes cristatus	0	0	2	0	0	0	0	0	1	1
3	WT	Willow Tit	Poeciles montanus	0	0	2	0	0	0	0	0	1	1
3	LT	Long-tailed Tit	Aegithalos caudatus	0	0	0	0	0	0	0	0	1	0
3	NH	Nuthatch	Sitta europeae	0	0	2	1	0	0	0	0	2	0
3	WA	Wallcreeper	Tichodroma muraria	0	0	0	0	0	0	0	1	0	1
3	TC	Treecreeper	Certhia familiaris	0	0	2	1	0	0	0	0	2	1
3	RS	Red-backed Shrike	Lanius collurio	2	1	0	2	1	0	0	0	2	1
3	J	Jay	Garrulus glandarius	1	0	2	0	0	2	0	0	1	0
3	NC	Nutcracker	Nucifraga caryocatactes	0	0	2	0	0	0	0	0	2	0
3	CG	Chough	Pyrrhocorax pyrrhocorax	1	0	0	2	0	0	3	0	0	0
3	AC	Alpine Chough	Pyrrhocorax gracilis	1	0	0	3	0	0	3	0	0	1
3	C	Crow	Corvus corone	2	0	1	0	0	3	2	0	0	0
3	RN	Raven	Corvus corax	1	0	0	1	3	1	1	1	0	0
3	MN	Snowfinch	Montifringilla nivalis	0	0	1	2	0	0	0	0	0	2
3	CH	Chaffinch	Fringella coelebs	0	0	1	0	0	2	0	0	0	0
3	LI	Linnet	Carduelis cannabina	1	1	0	1	0	1	0	0	1	0
3	LR	Redpoll	Carduelis flammea	0	1	0	1	0	1	0	0	1	1
3	GO	Goldfinch	Carduelis carduelis	1	0	1	1	0	1	0	0	1	0
3	SK	Siskin	Carduelis spinus	1	0	1	1	0	1	0	0	1	1
3	CF	Citril Finch	Carduelis citrinella	1	0	1	1	0	1	0	0	1	1
3	BF	Bullfinch	Pyrrhula pyrrhula	0	0	1	0	0	0	0	0	1	0
3	CR	Crossbill	Loxia curvirostra	0	0	1	0	0	0	0	0	1	0
3	Y	Yellowhammer	Emberiza citrinella	2	1	0	2	0	0	0	0	1	1
3	RU	Rock Bunting	Emberiza cia	2	1	0	2	0	0	0	0	1	1
4	LM	Lammergeier	Gypaetus barbatus	0	0	0	0	1	3	2	0	0	0
4	EA	Golden Eagle	Aquila chrysaetos	1	1	0	1	1	2	3	0	0	0
4	BZ	Buzzard	Buteo buteo	1	0	1	1	0	1	1	0	0	0
4	SH	Sparrowhawk	Accipiter nisus	0	0	0	0	0	1	1	0	0	0
4	K	Kestrel	Falco tinnunculus	1	1	0	0	1	1	1	0	0	0
4	PE	Peregrine falcon	Falco peregrinus	0	0	0	1	2	1	1	0	0	0
4	BG	Black Grouse	Tetrao tetrix	0	2	2	1	2	2	0	0	0	2
4	PT	Ptarmigan	Lagopus muta	0	1	0	0	1	3	0	0	0	3
4	RP	Rock Partridge	Alectoris graeca	3	2	0	1	0	2	0	0	0	1
4	Q	Quail	Coturnix coturnix	3	1	0	1	0	1	0	0	0	0
4	CK	Cuckoo	Cuculus canorus	0	1	0	0	0	0	0	0	0	0
4	SI	Swift	Apus apus	0	0	0	0	0	0	0	0	0	0
4	AS	Alpine Swift	Apus melba	0	0	0	0	0	0	0	0	0	2
4	GS	Greater spotted Woodpecker	Dendrocopos major	0	0	1	0	0	0	0	0	0	0
4	G	Green Woodpecker	Picus viridis	0	0	1	0	0	0	0	0	0	0
4	S	Skylark	Alauda arvensis	2	1	0	0	0	0	0	0	0	0
4	HM	House Martin	Delichon urbica	0	0	0	0	0	0	0	0	0	2
4	CM	Crag Martin	Ptyonoprogne rupestris	0	0	0	0	0	0	0	0	0	1
4	WI	Water Pipit	Anthus spinoletta	0	1	0	0	0	0	0	0	0	3
4	TP	Tree Pipit	Anthus trivialis	1	0	0	0	0	0	0	0	0	2
4	PW	White Wagtail	Motacilla alba	0	0	0	0	0	0	0	0	0	0
4	GL	Grey Wagtail	Motacilla cinerea	0	0	0	0	0	0	1	0	0	0
4	WR	Wren	Troglodytes troglodytes	0	0	0	0	0	0	0	0	0	0
4	DI	Dipper	Cinclus cinclus	0	0	0	0	0	0	1	0	0	1
4	D	Dunnock	Prunella modularis	0	1	0	0	0	0	0	0	0	0
4	AA	Alpine Accentor	Prunella collaris	0	0	0	0	0	0	0	0	0	1
4	R	Robin	Erithacus rubecula	0	0	0	0	0	0	0	0	0	0
4	BX	Black Redstart	Phoenicurus ochruros	0	0	0	0	0	0	0	0	0	0
4	W	Wheatear	Oenanthe oenanthe	1	2	0	0	0	0	0	0	0	1
4	WH	Whinchat	Saxicola rubetra	3	1	0	0	0	0	0	0	0	0
4	RO	Rock Thrush	Monticola saxatilis	2	1	0	0	0	0	0	0	0	2
4	ST	Song Thrush	Turdus philomelos	0	0	0	0	0	0	0	0	0	0
4	M	Mistle Thrush	Turdus viscivorus	0	0	0	0	0	0	0	0	0	0
4	FF	Fieldfare	Turdus pilaris	0	0	0	0	0	0	0	0	0	2
4	B	Blackbird	Turdus merula	0	0	0	0	0	0	0	0	0	0
4	RZ	Ring Ouzel	Turdus torquatus	0	1	1	0	0	0	0	0	0	3
4	GW	Garden Warbler	Sylvia borin	0	1	0	0	0	0	0	0	0	0
4	BC	Blackcap	Sylvia atricapilla	0	0	0	0	0	0	0	0	0	0
4	LW	Lesser Whitethroat	Sylvia curruca	0	1	0	0	0	0	0	0	0	0
4	IW	Bonelliâ€™s Warbler	Phylloscopus bonelli	0	0	0	0	0	0	0	0	0	1
4	CC	Chiffchaff	Phylloscopos collybita	0	0	0	0	0	0	0	0	0	0
4	GC	Goldcrest	Regulus regulus	0	0	1	0	0	0	0	0	0	0
4	FC	Firecrest	Regulus ignicapillus	0	0	1	0	0	0	0	0	0	0
4	CT	Coal Tit	Periparus ater	0	0	0	0	0	0	0	0	0	0
4	BT	Blue Tit	Cyanistes caeruleus	0	0	0	0	0	0	0	0	0	0
4	CI	Crested Tit	Lophophanes cristatus	0	0	0	0	0	0	0	0	0	0
4	WT	Willow Tit	Poeciles montanus	0	0	0	0	0	0	0	0	0	1
4	LT	Long-tailed Tit	Aegithalos caudatus	0	0	0	0	0	0	0	0	0	0
4	NH	Nuthatch	Sitta europeae	0	0	0	0	0	0	0	0	0	0
4	WA	Wallcreeper	Tichodroma muraria	0	0	0	0	0	0	0	0	0	2
4	TC	Treecreeper	Certhia familiaris	0	0	1	0	0	0	0	0	0	0
4	RS	Red-backed Shrike	Lanius collurio	3	1	0	0	0	0	0	0	0	1
4	J	Jay	Garrulus glandarius	0	0	0	0	0	0	0	0	0	0
4	NC	Nutcracker	Nucifraga caryocatactes	0	0	1	0	0	0	0	0	0	0
4	CG	Chough	Pyrrhocorax pyrrhocorax	0	1	0	1	0	0	0	0	0	2
4	AC	Alpine Chough	Pyrrhocorax gracilis	0	1	0	0	0	0	0	0	0	1
4	C	Crow	Corvus corone	0	0	0	0	0	0	0	0	0	0
4	RN	Raven	Corvus corax	0	0	0	0	0	1	0	0	0	0
4	MN	Snowfinch	Montifringilla nivalis	0	1	0	0	0	0	0	0	0	3
4	CH	Chaffinch	Fringella coelebs	0	0	0	0	0	0	0	0	0	0
4	LI	Linnet	Carduelis cannabina	2	1	0	0	0	0	0	0	0	0
4	LR	Redpoll	Carduelis flammea	0	1	0	0	0	0	0	0	0	2
4	GO	Goldfinch	Carduelis carduelis	2	0	0	0	0	0	0	0	0	0
4	SK	Siskin	Carduelis spinus	0	0	0	0	0	0	0	0	0	2
4	CF	Citril Finch	Carduelis citrinella	1	1	0	0	0	0	0	0	0	0
4	BF	Bullfinch	Pyrrhula pyrrhula	0	0	1	0	0	0	0	0	0	2
4	CR	Crossbill	Loxia curvirostra	0	0	0	0	0	0	0	0	0	0
4	Y	Yellowhammer	Emberiza citrinella	2	0	0	0	0	0	0	0	0	0
4	RU	Rock Bunting	Emberiza cia	0	1	0	0	0	0	0	0	0	0
5	LM	Lammergeier	Gypaetus barbatus	2	0	0	3	3	1	2	0	0	1
5	EA	Golden Eagle	Aquila chrysaetos	1	1	1	3	3	1	2	0	1	1
5	BZ	Buzzard	Buteo buteo	1	0	1	2	2	0	1	0	1	0
5	SH	Sparrowhawk	Accipiter nisus	0	0	1	2	2	0	0	0	2	0
5	K	Kestrel	Falco tinnunculus	2	0	0	2	2	0	1	0	0	0
5	PE	Peregrine falcon	Falco peregrinus	0	0	0	2	2	0	2	0	0	0
5	BG	Black Grouse	Tetrao tetrix	1	3	2	3	3	2	0	0	1	2
5	PT	Ptarmigan	Lagopus muta	0	3	0	3	3	2	0	0	0	2
5	RP	Rock Partridge	Alectoris graeca	3	3	0	3	3	2	0	0	0	2
5	Q	Quail	Coturnix coturnix	1	1	0	2	2	0	0	0	0	0
5	CK	Cuckoo	Cuculus canorus	0	0	1	1	1	0	0	0	1	0
5	SI	Swift	Apus apus	0	0	0	0	0	0	1	0	0	0
5	AS	Alpine Swift	Apus melba	0	0	0	0	0	0	1	0	0	0
5	GS	Greater spotted Woodpecker	Dendrocopos major	0	0	2	2	2	0	0	0	2	0
5	G	Green Woodpecker	Picus viridus	1	0	2	2	2	0	0	0	2	0
5	S	Skylark	Alauda arvensis	2	3	0	1	1	0	0	0	0	0
5	HM	House Martin	Delichon urbica	0	0	0	0	0	0	0	0	0	0
5	CM	Crag Martin	Ptyonoprogne rupestris	0	0	0	0	0	0	0	0	0	0
5	WI	Water Pipit	Anthus spinoletta	1	3	0	1	1	0	0	0	0	0
5	TP	Tree Pipit	Anthus trivialis	2	3	0	1	1	0	0	0	0	0
5	PW	White Wagtail	Motacilla alba	2	0	0	0	0	0	0	0	0	0
5	GL	Grey Wagtail	Motacilla cinerea	1	0	0	1	1	0	1	0	0	0
5	WR	Wren	Troglodytes troglodytes	0	1	1	1	1	0	0	0	1	0
5	DI	Dipper	Cinclus cinclus	0	0	0	2	2	0	2	0	0	1
5	D	Dunnock	Prunella modularis	0	1	1	1	1	0	0	0	1	0
5	AA	Alpine Accentor	Prunella collaris	1	2	0	1	1	0	0	0	0	0
5	R	Robin	Erithacus rubecula	0	0	1	1	1	0	0	0	1	1
5	BX	Black Redstart	Phoenicurus ochruros	2	0	0	1	1	0	0	0	0	0
5	W	Wheatear	Oenanthe oenanthe	2	3	0	2	2	0	0	0	0	0
5	WH	Whinchat	Saxicola rubetra	2	3	0	2	2	0	0	0	0	0
5	RO	Rock Thrush	Monticola saxatilis	2	2	0	2	2	0	0	0	0	0
5	ST	Song Thrush	Turdus philomelos	0	0	2	1	1	0	0	0	2	0
5	M	Mistle Thrush	Turdus viscivorus	1	0	1	1	1	0	0	0	2	0
5	FF	Fieldfare	Turdus pilaris	1	0	1	1	1	0	0	0	2	0
5	B	Blackbird	Turdus merula	1	0	1	0	0	0	0	0	1	0
5	RZ	Ring Ouzel	Turdus torquatus	1	0	1	1	1	0	0	0	2	0
5	GW	Garden Warbler	Sylvia borin	0	0	1	1	1	0	0	0	2	0
5	BC	Blackcap	Sylvia atricapilla	0	0	1	1	1	0	0	0	2	0
5	LW	Lesser Whitethroat	Sylvia curruca	0	1	1	1	1	0	0	0	1	0
5	IW	Bonelliâ€™s Warbler	Phylloscopus bonelli	0	0	1	1	1	0	0	0	2	0
5	CC	Chiffchaff	Phylloscopos collybita	0	0	1	1	1	0	0	0	2	0
5	GC	Goldcrest	Regulus regulus	0	0	1	2	2	0	0	0	2	0
5	FC	Firecrest	Regulus ignicapillus	0	0	1	2	2	0	0	0	2	0
5	CT	Coal Tit	Periparus ater	0	0	2	2	2	0	0	0	2	0
5	BT	Blue Tit	Cyanistes caeruleus	0	0	1	1	1	0	0	0	2	0
5	CI	Crested Tit	Lophophanes cristatus	0	0	2	2	2	0	0	0	2	0
5	WT	Willow Tit	Poeciles montanus	0	0	2	2	2	0	0	0	2	0
5	LT	Long-tailed Tit	Aegithalos caudatus	0	0	1	1	1	0	0	0	2	0
5	NH	Nuthatch	Sitta europaea	0	0	2	2	2	0	0	0	2	0
5	WA	Wallcreeper	Tichodroma muraria	0	0	0	1	1	0	0	0	0	1
5	TC	Treecreeper	Certhia familiaris	0	0	2	2	2	0	0	0	2	0
5	RS	Red-backed Shrike	Lanius collurio	3	1	0	2	2	0	0	0	0	0
5	J	Jay	Garrulus glandarius	0	0	1	1	1	0	0	0	1	0
5	NC	Nutcracker	Nucifraga caryocatactes	0	0	2	2	2	0	0	0	2	0
5	CG	Chough	Pyrrhocorax pyrrhocorax	2	0	0	2	2	0	0	0	0	0
5	AC	Alpine Chough	Pyrrhocorax graculus	1	0	0	0	0	0	0	0	0	0
5	C	Crow	Corvus corone	3	0	0	0	0	0	0	0	0	0
5	RN	Raven	Corvus corax	2	0	0	1	1	0	1	0	0	0
5	MN	Snowfinch	Montifringilla nivalis	1	0	0	1	1	0	0	0	0	1
5	CH	Chaffinch	Fringilla coelebs	1	0	1	0	0	0	0	0	1	0
5	LI	Linnet	Carduelis cannabina	2	1	0	1	1	0	0	0	0	0
5	LR	Redpoll	Carduelis flammea	0	0	0	1	1	0	0	0	1	0
5	GO	Goldfinch	Carduelis carduelis	2	0	0	0	0	0	0	0	0	0
5	SK	Siskin	Carduelis spinus	0	0	1	1	1	0	0	0	2	0
5	CF	Citril Finch	Carduelis citrinella	2	0	0	1	1	0	0	0	0	0
5	BF	Bullfinch	Pyrrhula pyrrhula	0	0	1	1	1	0	0	0	2	0
5	CR	Crossbill	Loxia curvirostra	0	0	1	1	1	0	0	0	2	0
5	Y	Yellowhammer	Emberiza citrinella	2	1	0	1	1	0	0	0	0	0
5	RU	Rock Bunting	Emberiza cia	1	1	0	1	1	0	0	0	0	0
6	LM	Lammergeier	Gypaetus barbatus	1	0	0	2	2	3	1	0	0	0
6	EA	Golden Eagle	Aquila chrysaetos	2	0	1	3	2	3	1	0	0	0
6	BZ	Buzzard	Buteo buteo	3	1	2	1	1	1	1	0	0	0
6	SH	Sparrowhawk	Accipiter nisus	2	1	2	1	0	0	0	0	0	0
6	K	Kestrel	Falco tinnunculus	3	1	1	1	0	0	0	0	0	0
6	PE	Peregrine falcon	Falco peregrinus	1	0	0	2	2	0	1	0	0	0
6	BG	Black Grouse	Tetrao tetrix	2	3	3	2	1	2	1	0	1	2
6	PT	Ptarmigan	Lagopus muta	0	2	0	0	2	3	1	0	0	3
6	RP	Rock Partridge	Alectoris graeca	3	2	1	2	1	2	1	0	0	1
6	Q	Quail	Coturnix coturnix	3	1	0	1	0	1	0	0	0	1
6	CK	Cuckoo	Cuculus canorus	2	0	3	1	0	0	0	0	0	2
6	SI	Swift	Apus apus	0	0	0	0	0	0	0	0	0	1
6	AS	Alpine Swift	Apus melba	0	0	0	0	0	0	0	0	0	0
6	GS	Greater spotted Woodpecker	Dendrocopos major	1	0	3	1	0	0	0	0	0	0
6	G	Green Woodpecker	Picus viridus	2	1	3	1	0	0	0	0	0	0
6	S	Skylark	Alauda arvensis	3	2	0	2	0	0	0	0	1	0
6	HM	House Martin	Delichon urbica	1	0	0	1	0	0	0	0	0	0
6	CM	Crag Martin	Ptyonoprogne rupestris	0	0	0	2	0	0	0	0	0	0
6	WI	Water Pipit	Anthus spinoletta	2	1	0	1	1	0	0	0	0	1
6	TP	Tree Pipit	Anthus trivialis	3	2	2	1	0	0	0	0	0	0
6	PW	White Wagtail	Motacilla alba	2	0	0	2	0	0	2	0	0	1
6	GL	Grey Wagtail	Motacilla cinerea	1	1	0	2	0	0	1	0	0	2
6	WR	Wren	Troglodytes troglodytes	0	1	2	0	0	0	0	0	0	0
6	DI	Dipper	Cinclus cinclus	0	0	0	1	1	0	1	0	0	2
6	D	Dunnock	Prunella modularis	1	2	2	0	0	0	0	0	0	0
6	AA	Alpine Accentor	Prunella collaris	0	1	0	0	0	0	0	0	0	0
6	R	Robin	Erithacus rubecula	0	1	2	1	0	0	0	0	0	0
6	BX	Black Redstart	Phoenicurus ochruros	2	1	0	0	0	0	0	0	0	0
6	W	Wheatear	Oenanthe oenanthe	2	2	0	1	1	0	0	0	0	0
6	WH	Whinchat	Saxicola rubetra	3	2	1	1	0	0	0	0	0	1
6	RO	Rock Thrush	Monticola saxatilis	2	1	0	1	0	0	0	0	0	0
6	ST	Song Thrush	Turdus philomelos	2	1	3	1	0	0	0	0	0	1
6	M	Mistle Thrush	Turdus viscivorus	3	0	3	1	0	0	0	0	0	0
6	FF	Fieldfare	Turdus pilaris	3	1	3	1	0	0	0	0	0	0
6	B	Blackbird	Turdus merula	2	1	2	1	0	0	0	0	0	0
6	RZ	Ring Ouzel	Turdus torquatus	3	2	3	2	0	0	0	0	0	0
6	GW	Garden Warbler	Sylvia borin	1	1	2	0	0	0	0	0	0	0
6	BC	Blackcap	Sylvia atricapilla	2	2	2	1	0	0	0	0	0	0
6	LW	Lesser Whitethroat	Sylvia curruca	3	2	2	1	0	0	0	0	0	0
6	IW	Bonelliâ€šÃ„Ã´s Warbler	Phylloscopus bonelli	1	1	2	1	0	0	0	0	0	0
6	CC	Chiffchaff	Phylloscopos collybita	1	1	2	0	0	0	0	0	0	0
6	GC	Goldcrest	Regulus regulus	0	0	1	1	0	0	0	0	0	0
6	FC	Firecrest	Regulus ignicapillus	1	0	2	1	0	0	0	0	0	0
6	CT	Coal Tit	Periparus ater	0	0	1	0	0	0	0	0	0	0
6	BT	Blue Tit	Cyanistes caeruleus	1	0	2	1	0	0	0	0	0	0
6	CI	Crested Tit	Lophophanes cristatus	0	0	1	0	0	0	0	0	0	0
6	WT	Willow Tit	Poeciles montanus	1	0	2	0	0	0	0	0	0	1
6	LT	Long-tailed Tit	Aegithalos caudatus	2	1	2	0	0	0	0	0	0	0
6	NH	Nuthatch	Sitta europeae	0	0	3	1	0	0	0	0	0	0
6	WA	Wallcreeper	Tichodroma muraria	0	0	0	0	0	0	0	0	0	0
6	TC	Treecreeper	Certhia familiaris	0	0	2	0	0	0	0	0	0	0
6	RS	Red-backed Shrike	Lanius collurio	3	2	0	2	0	0	0	0	0	0
6	J	Jay	Garrulus glandarius	1	0	2	1	0	0	0	0	0	0
6	NC	Nutcracker	Nucifraga caryocatactes	1	0	2	1	0	0	0	0	0	0
6	CG	Chough	Pyrrhocorax pyrrhocorax	2	1	0	1	1	0	0	0	0	2
6	AC	Alpine Chough	Pyrrhocorax gracilis	0	1	0	0	0	0	0	0	0	0
6	C	Crow	Corvus corone	2	0	0	1	0	1	0	0	0	0
6	RN	Raven	Corvus corax	2	0	0	1	1	1	0	0	0	0
6	MN	Snowfinch	Montifringilla nivalis	1	0	0	1	0	0	0	0	0	2
6	CH	Chaffinch	Fringella coelebs	1	0	1	0	0	0	0	0	0	0
6	LI	Linnet	Carduelis cannabina	3	2	0	1	0	0	0	0	0	0
6	LR	Redpoll	Carduelis flammea	3	3	2	1	0	0	0	0	0	0
6	GO	Goldfinch	Carduelis carduelis	2	1	0	0	0	0	0	0	0	0
6	SK	Siskin	Carduelis spinus	0	0	0	0	0	0	0	0	0	0
6	CF	Citril Finch	Carduelis citrinella	2	1	3	1	0	0	0	0	0	0
6	BF	Bullfinch	Pyrrhula pyrrhula	0	0	2	1	0	0	0	0	0	0
6	CR	Crossbill	Loxia curvirostra	1	1	2	1	0	0	0	0	0	1
6	Y	Yellowhammer	Emberiza citrinella	3	1	2	2	0	0	0	0	0	0
6	RU	Rock Bunting	Emberiza cia	2	1	1	0	0	0	0	0	0	0
7	LM	Lammergeier	Gypaetus barbatus	2	0	0	0	1	1	1	0	0	0
7	EA	Golden Eagle	Aquila chrysaetos	2	0	0	0	1	0	1	0	0	0
7	BZ	Buzzard	Buteo buteo	0	0	0	0	0	0	1	0	0	0
7	SH	Sparrowhawk	Accipiter nisus	0	0	1	0	0	0	0	0	0	0
7	K	Kestrel	Falco tinnunculus	1	0	0	0	0	0	0	0	0	0
7	PE	Peregrine falcon	Falco peregrinus	0	0	0	0	1	0	0	0	0	0
7	BG	Black Grouse	Tetrao tetrix	2	1	1	0	2	1	0	0	0	1
7	PT	Ptarmigan	Lagopus mutus	1	1	0	0	2	1	0	0	0	3
7	RP	Rock Partridge	Alectoris graeca	2	1	0	0	2	1	0	0	0	2
7	Q	Quail	Coturnix coturnix	2	1	0	0	0	0	0	0	0	1
7	CK	Cuckoo	Cuculus canorus	0	0	0	0	0	0	0	0	0	0
7	SI	Swift	Apus apus	0	0	0	0	0	0	0	0	0	0
7	AS	Alpine Swift	Apus melba	0	0	0	0	0	0	0	0	0	0
7	GS	Greater spotted Woodpecker	Dendrocopos major	0	0	0	0	0	0	0	0	0	0
7	G	Green Woodpecker	Picus viridus	1	0	0	0	0	0	0	0	0	0
7	S	Skylark	Alauda arvensis	2	1	0	0	0	0	0	0	0	0
7	HM	House Martin	Delichon urbica	0	0	0	0	0	0	0	0	0	0
7	CM	Crag Martin	Ptyonoprogne rupestris	0	0	0	0	0	0	0	0	0	0
7	WI	Water Pipit	Anthus spinoletta	1	0	0	0	0	0	0	0	0	0
7	TP	Tree Pipit	Anthus trivialis	2	0	0	0	0	0	0	0	0	0
7	PW	White Wagtail	Motacilla alba	1	0	0	0	0	0	0	0	0	0
7	GL	Grey Wagtail	Motacilla cinerea	1	0	0	0	0	0	0	0	0	0
7	WR	Wren	Troglodytes troglodytes	0	0	0	0	0	0	0	0	0	0
7	DI	Dipper	Cinclus cinclus	0	0	0	0	0	0	0	0	0	0
7	D	Dunnock	Prunella modularis	0	0	0	0	0	0	0	0	0	0
7	AA	Alpine Accentor	Prunella collaris	0	0	0	0	0	0	0	0	0	0
7	R	Robin	Erithacus rubecula	0	0	0	0	0	0	0	0	0	0
7	BX	Black Redstart	Phoenicurus ochruros	0	0	0	0	0	0	0	0	0	0
7	W	Wheatear	Oenanthe oenanthe	1	0	0	0	0	0	0	0	0	0
7	WH	Whinchat	Saxicola rubetra	1	0	0	0	0	0	0	0	0	0
7	RO	Rock Thrush	Monticola saxatilis	0	0	0	0	0	0	0	0	0	0
7	ST	Song Thrush	Turdus philomelos	1	0	0	0	0	0	0	0	0	0
7	M	Mistle Thrush	Turdus viscivorus	1	0	0	0	0	0	0	0	0	0
7	FF	Fieldfare	Turdus pilaris	1	0	0	0	0	0	0	0	0	0
7	B	Blackbird	Turdus merula	0	0	0	0	0	0	0	0	0	0
7	RZ	Ring Ouzel	Turdus torquatus	1	0	0	0	0	0	0	0	0	0
7	GW	Garden Warbler	Sylvia borin	0	0	0	0	0	0	0	0	0	0
7	BC	Blackcap	Sylvia atricapilla	0	0	0	0	0	0	0	0	0	0
7	LW	Lesser Whitethroat	Sylvia curruca	0	0	0	0	0	0	0	0	0	0
7	IW	Bonelliâ€™s Warbler	Phylloscopus bonelli	0	0	0	0	0	0	0	0	0	0
7	CC	Chiffchaff	Phylloscopos collybita	0	0	0	0	0	0	0	0	0	0
7	GC	Goldcrest	Regulus regulus	0	0	0	0	0	0	0	0	0	0
7	FC	Firecrest	Regulus ignicapillus	0	0	0	0	0	0	0	0	0	0
7	CT	Coal Tit	Periparus ater	0	0	0	0	0	0	0	0	0	0
7	BT	Blue Tit	Cyanistes caeruleus	0	0	0	0	0	0	0	0	0	0
7	CI	Crested Tit	Lophophanes cristatus	0	0	0	0	0	0	0	0	0	0
7	WT	Willow Tit	Poeciles montanus	0	0	0	0	0	0	0	0	0	0
7	LT	Long-tailed Tit	Aegithalos caudatus	0	0	0	0	0	0	0	0	0	0
7	NH	Nuthatch	Sitta europaea	0	0	0	0	0	0	0	0	0	0
7	WA	Wallcreeper	Tichodroma muraria	0	0	0	0	0	0	0	1	0	0
7	TC	Treecreeper	Certhia familiaris	0	0	0	0	0	0	0	0	0	0
7	RS	Red-backed Shrike	Lanius collurio	2	0	0	0	0	0	0	0	0	0
7	J	Jay	Garrulus glandarius	0	0	0	0	0	0	0	0	0	0
7	NC	Nutcracker	Nucifraga caryocatactes	0	0	0	0	0	0	0	0	0	0
7	CG	Chough	Pyrrhocorax pyrrhocorax	0	0	0	0	1	0	0	0	0	0
7	AC	Alpine Chough	Pyrrhocorax gracilis	0	0	0	0	1	0	0	0	0	0
7	C	Crow	Corvus corone	0	0	0	0	0	0	0	0	0	0
7	RN	Raven	Corvus corax	0	0	0	0	0	0	0	0	0	0
7	MN	Snowfinch	Montifringilla nivalis	0	0	0	1	0	0	0	0	0	0
7	CH	Chaffinch	Fringella coelebs	0	0	0	0	0	0	0	0	0	0
7	LI	Linnet	Carduelis cannabina	0	0	0	0	0	0	0	0	0	0
7	LR	Redpoll	Carduelis flammea	0	0	0	0	0	0	0	0	0	0
7	GO	Goldfinch	Carduelis carduelis	0	0	0	0	0	0	0	0	0	0
7	SK	Siskin	Carduelis spinus	0	0	0	0	0	0	0	0	0	0
7	CF	Citril Finch	Carduelis citrinella	0	0	0	0	0	0	0	0	0	0
7	BF	Bullfinch	Pyrrhula pyrrhula	0	0	0	0	0	0	0	0	0	0
7	CR	Crossbill	Loxia curvirostra	0	0	0	0	0	0	0	0	0	0
7	Y	Yellowhammer	Emberiza citrinella	0	0	0	0	0	0	0	0	0	0
7	RU	Rock Bunting	Emberiza cia	0	0	0	0	0	0	0	0	0	0
8	LM	Lammergeier	Gypaetus barbatus	2	0	0	3	3	3	3	1	0	1
8	EA	Golden Eagle	Aquila chrysaetos	1	0	1	3	2	2	2	1	0	1
8	BZ	Buzzard	Buteo buteo	2	0	1	1	1	1	1	0	0	0
8	SH	Sparrowhawk	Accipiter nisus	0	0	3	2	3	1	2	1	2	0
8	K	Kestrel	Falco tinnunculus	0	0	1	0	1	1	1	0	0	0
8	PE	Peregrine falcon	Falco peregrinus	0	0	1	0	2	1	1	0	0	0
8	BG	Black Grouse	Tetrao tetrix	2	2	3	3	3	3	3	1	1	2
8	PT	Ptarmigan	Lagopus muta	0	2	0	2	3	3	3	0	0	3
8	RP	Rock Partridge	Alectoris graeca	3	2	0	2	3	3	3	1	1	0
8	Q	Quail	Coturnix coturnix	3	1	0	2	2	3	2	1	1	2
8	CK	Cuckoo	Cuculus canorus	0	0	1	1	0	1	2	1	0	0
8	SI	Swift	Apus apus	0	0	0	1	0	0	1	0	0	0
8	AS	Alpine Swift	Apus melba	0	0	0	0	0	0	1	0	0	0
8	GS	Greater spotted Woodpecker	Dendrocopos major	0	0	1	1	0	1	1	1	1	0
8	G	Green Woodpecker	Picus viridus	0	0	2	1	0	1	1	1	1	0
8	S	Skylark	Alauda arvensis	3	2	0	2	1	3	2	1	1	2
8	HM	House Martin	Delichon urbica	2	0	0	1	0	1	1	0	0	0
8	CM	Crag Martin	Ptyonoprogne rupestris	1	0	0	1	0	1	1	0	0	0
8	WI	Water Pipit	Anthus spinoletta	2	2	0	2	1	2	2	1	0	0
8	TP	Tree Pipit	Anthus trivialis	2	2	1	2	1	2	2	1	1	1
8	PW	White Wagtail	Motacilla alba	0	1	0	1	1	2	2	1	0	0
8	GL	Grey Wagtail	Motacilla cinerea	0	1	0	1	1	2	2	1	0	1
8	WR	Wren	Troglodytes troglodytes	0	0	2	1	1	1	1	1	2	0
8	DI	Dipper	Cinclus cinclus	0	2	2	3	3	2	3	2	1	1
8	D	Dunnock	Prunella modularis	1	1	0	2	1	2	2	1	1	0
8	AA	Alpine Accentor	Prunella collaris	1	1	0	1	1	2	2	1	1	1
8	R	Robin	Erithacus rubecula	0	0	1	1	0	3	1	1	1	0
8	BX	Black Redstart	Phoenicurus ochruros	2	1	0	1	1	2	1	0	0	0
8	W	Wheatear	Oenanthe oenanthe	1	1	0	2	1	2	2	1	1	1
8	WH	Whinchat	Saxicola rubetra	1	1	0	2	1	2	2	0	1	1
8	RO	Rock Thrush	Monticola saxatilis	0	1	0	1	1	1	1	1	1	0
8	ST	Song Thrush	Turdus philomelos	0	0	1	2	1	3	1	1	2	0
8	M	Mistle Thrush	Turdus viscivorus	0	0	1	2	1	3	1	1	2	0
8	FF	Fieldfare	Turdus pilaris	0	0	1	2	1	3	1	1	2	0
8	B	Blackbird	Turdus merula	0	0	0	1	0	3	1	1	1	0
8	RZ	Ring Ouzel	Turdus torquatus	0	0	0	2	1	3	1	1	2	0
8	GW	Garden Warbler	Sylvia borin	0	0	2	2	1	2	1	1	2	0
8	BC	Blackcap	Sylvia atricapilla	1	0	1	1	1	2	1	1	1	0
8	LW	Lesser Whitethroat	Sylvia curruca	1	0	0	2	1	2	1	1	1	0
8	IW	Bonelliâ€™s Warbler	Phylloscopus bonelli	0	0	1	2	1	2	1	1	2	1
8	CC	Chiffchaff	Phylloscopos collybita	0	0	0	1	1	2	1	1	1	1
8	GC	Goldcrest	Regulus regulus	0	0	1	1	1	1	1	1	1	0
8	FC	Firecrest	Regulus ignicapillus	0	0	1	1	1	1	1	1	1	0
8	CT	Coal Tit	Periparus ater	0	0	0	1	0	1	1	1	1	0
8	BT	Blue Tit	Cyanistes caeruleus	0	0	0	1	1	1	1	1	1	0
8	CI	Crested Tit	Lophophanes cristatus	0	0	0	1	0	1	1	1	1	0
8	WT	Willow Tit	Poeciles montanus	0	0	2	2	1	1	1	1	2	1
8	LT	Long-tailed Tit	Aegithalos caudatus	0	0	0	1	0	1	1	1	1	0
8	NH	Nuthatch	Sitta europeae	0	0	2	2	1	1	1	1	1	0
8	WA	Wallcreeper	Tichodroma muraria	0	0	0	1	3	1	1	0	0	0
8	TC	Treecreeper	Certhia familiaris	0	0	2	1	1	1	1	1	1	0
8	RS	Red-backed Shrike	Lanius collurio	2	1	0	2	1	2	2	1	1	2
8	J	Jay	Garrulus glandarius	0	0	2	1	1	2	1	1	1	0
8	NC	Nutcracker	Nucifraga caryocatactes	0	0	2	2	1	2	1	1	2	1
8	CG	Chough	Pyrrhocorax pyrrhocorax	0	0	0	1	2	2	2	1	0	1
8	AC	Alpine Chough	Pyrrhocorax gracilis	0	0	0	1	2	2	2	1	0	1
8	C	Crow	Corvus corone	1	0	0	1	1	2	2	0	0	0
8	RN	Raven	Corvus corax	2	0	0	1	1	3	2	1	0	0
8	MN	Snowfinch	Montifringilla nivalis	0	0	0	1	1	1	1	1	0	2
8	CH	Chaffinch	Fringella coelebs	0	0	0	0	0	3	1	1	0	0
8	LI	Linnet	Carduelis cannabina	0	0	0	1	0	2	1	1	0	0
8	LR	Redpoll	Carduelis flammea	0	0	0	1	0	2	1	1	0	0
8	GO	Goldfinch	Carduelis carduelis	0	0	0	0	0	3	1	1	0	0
8	SK	Siskin	Carduelis spinus	0	0	0	1	0	2	1	1	0	0
8	CF	Citril Finch	Carduelis citrinella	0	0	0	1	0	2	1	1	0	0
8	BF	Bullfinch	Pyrrhula pyrrhula	0	0	1	1	0	2	1	1	0	0
8	CR	Crossbill	Loxia curvirostra	0	0	2	1	0	2	1	1	2	2
8	Y	Yellowhammer	Emberiza citrinella	0	1	0	2	1	2	2	1	1	1
8	RU	Rock Bunting	Emberiza cia	0	1	0	1	1	2	1	1	1	1
9	LM	Lammergeier	Gypaetus barbatus	0	0	0	0	2	2	1	0	0	1
9	EA	Golden Eagle	Aquila chrysaetos	1	0	0	0	2	1	1	0	0	1
9	BZ	Buzzard	Buteo buteo	1	0	1	0	0	1	1	0	0	0
9	SH	Sparrowhawk	Accipiter nisus	0	0	0	0	0	1	1	0	0	0
9	K	Kestrel	Falco tinnunculus	1	0	0	0	1	1	1	0	0	0
9	PE	Peregrine falcon	Falco peregrinus	0	0	0	0	1	1	1	0	0	0
9	BG	Black Grouse	Tetrao tetrix	0	1	0	1	3	3	0	0	0	1
9	PT	Ptarmigan	Lagopus muta	0	1	0	1	3	3	0	0	0	3
9	RP	Rock Partridge	Alectoris graeca	2	1	0	1	3	3	0	0	0	1
9	Q	Quail	Coturnix coturnix	3	1	0	0	2	1	0	0	0	0
9	CK	Cuckoo	Cuculus canorus	0	0	0	0	0	0	0	0	0	1
9	SI	Swift	Apus apus	0	0	0	0	0	0	0	0	0	1
9	AS	Alpine Swift	Apus melba	0	0	0	0	1	0	0	0	0	1
9	GS	Greater spotted Woodpecker	Dendrocopos major	0	0	1	0	0	0	0	0	0	0
9	G	Green Woodpecker	Picus viridus	0	0	1	0	0	0	0	0	0	0
9	S	Skylark	Alauda arvensis	2	1	0	0	1	2	0	0	0	1
9	HM	House Martin	Delichon urbica	1	0	0	0	0	0	0	0	0	1
9	CM	Crag Martin	Ptyonoprogne rupestris	0	0	0	0	0	0	0	0	0	0
9	WI	Water Pipit	Anthus spinoletta	1	1	0	0	1	1	0	0	0	0
9	TP	Tree Pipit	Anthus trivialis	2	1	0	0	0	0	0	0	0	1
9	PW	White Wagtail	Motacilla alba	1	0	0	0	0	1	0	0	0	0
9	GL	Grey Wagtail	Motacilla cinerea	1	0	0	0	0	1	1	0	0	0
9	WR	Wren	Troglodytes troglodytes	0	0	0	0	0	0	0	0	0	0
9	DI	Dipper	Cinclus cinclus	0	0	0	0	0	0	1	0	0	0
9	D	Dunnock	Prunella modularis	0	0	0	0	0	1	0	0	0	0
9	AA	Alpine Accentor	Prunella collaris	0	0	0	0	0	0	0	0	0	0
9	R	Robin	Erithacus rubecula	0	0	0	0	0	1	0	0	0	0
9	BX	Black Redstart	Phoenicurus ochruros	0	0	0	0	0	0	0	0	0	0
9	W	Wheatear	Oenanthe oenanthe	1	0	0	0	1	0	0	0	0	1
9	WH	Whinchat	Saxicola rubetra	2	1	0	0	1	0	0	0	0	1
9	RO	Rock Thrush	Monticola saxatilis	2	0	0	0	1	0	0	0	0	0
9	ST	Song Thrush	Turdus philomelos	0	0	0	0	0	1	0	0	0	0
9	M	Mistle Thrush	Turdus viscivorus	1	0	0	0	0	1	0	0	0	0
9	FF	Fieldfare	Turdus pilaris	0	0	0	0	0	1	0	0	0	0
9	B	Blackbird	Turdus merula	1	0	0	0	0	1	0	0	0	0
9	RZ	Ring Ouzel	Turdus torquatus	0	0	0	0	1	1	0	0	0	0
9	GW	Garden Warbler	Sylvia borin	0	0	0	0	0	0	0	0	0	1
9	BC	Blackcap	Sylvia atricapilla	0	0	0	0	0	1	0	0	0	0
9	LW	Lesser Whitethroat	Sylvia curruca	0	0	0	0	0	0	0	0	0	1
9	IW	Bonelli’s Warbler	Phylloscopus bonelli	0	0	0	0	0	0	0	0	0	1
9	CC	Chiffchaff	Phylloscopos collybita	0	0	0	0	0	0	0	0	0	0
9	GC	Goldcrest	Regulus regulus	0	0	0	0	0	1	0	0	0	0
9	FC	Firecrest	Regulus ignicapillus	0	0	0	0	0	1	0	0	0	0
9	CT	Coal Tit	Periparus ater	0	0	0	0	0	1	0	0	0	0
9	BT	Blue Tit	Cyanistes caeruleus	0	0	0	0	0	1	0	0	0	0
9	CI	Crested Tit	Lophophanes cristatus	0	0	0	0	0	0	0	0	0	0
9	WT	Willow Tit	Poeciles montanus	0	0	0	0	0	0	0	0	0	0
9	LT	Long-tailed Tit	Aegithalos caudatus	0	0	0	0	0	0	0	0	0	0
9	NH	Nuthatch	Sitta europeae	0	0	1	0	0	0	0	0	0	0
9	WA	Wallcreeper	Tichodroma muraria	0	0	0	0	0	0	0	0	0	0
9	TC	Treecreeper	Certhia familiaris	0	0	1	0	0	0	0	0	0	0
9	RS	Red-backed Shrike	Lanius collurio	3	0	0	0	0	0	0	0	0	0
9	J	Jay	Garrulus glandarius	0	0	0	0	0	1	0	0	0	0
9	NC	Nutcracker	Nucifraga caryocatactes	0	0	0	0	0	0	0	0	0	0
9	CG	Chough	Pyrrhocorax pyrrhocorax	1	0	0	0	0	0	1	0	0	0
9	AC	Alpine Chough	Pyrrhocorax gracilis	1	0	0	0	0	0	1	0	0	0
9	C	Crow	Corvus corone	1	0	0	0	0	1	0	0	0	0
9	RN	Raven	Corvus corax	1	0	0	0	1	1	1	0	0	0
9	MN	Snowfinch	Montifringilla nivalis	0	0	0	0	1	0	0	0	0	1
9	CH	Chaffinch	Fringella coelebs	0	0	0	0	0	1	0	0	0	0
9	LI	Linnet	Carduelis cannabina	2	0	0	0	0	1	0	0	0	0
9	LR	Redpoll	Carduelis flammea	0	0	0	0	0	1	0	0	0	0
9	GO	Goldfinch	Carduelis carduelis	1	0	0	0	0	1	0	0	0	0
9	SK	Siskin	Carduelis spinus	0	0	0	0	0	1	0	0	0	0
9	CF	Citril Finch	Carduelis citrinella	1	0	0	0	0	1	0	0	0	0
9	BF	Bullfinch	Pyrrhula pyrrhula	0	0	0	0	0	1	0	0	0	0
9	CR	Crossbill	Loxia curvirostra	0	0	0	0	0	1	0	0	0	0
9	Y	Yellowhammer	Emberiza citrinella	3	0	0	0	0	2	0	0	0	0
9	RU	Rock Bunting	Emberiza cia	1	0	0	0	0	1	0	0	0	0
10	LM	Lammergeier	Gypaetus barbatus	3	0	1	1	0	3	1	1	0	1
10	EA	Golden Eagle	Aquila chrysaetos	3	1	1	1	1	2	1	1	0	1
10	BZ	Buzzard	Buteo buteo	1	0	1	0	0	2	1	0	0	0
10	SH	Sparrowhawk	Accipiter nisus	0	0	2	0	0	2	1	0	0	0
10	K	Kestrel	Falco tinnunculus	3	1	0	0	0	2	1	0	0	0
10	PE	Peregrine falcon	Falco peregrinus	0	0	0	1	2	2	1	1	0	0
10	BG	Black Grouse	Tetrao tetrix	2	1	1	1	1	3	0	0	1	3
10	PT	Ptarmigan	Lagopus muta	2	2	0	1	2	3	0	0	0	3
10	RP	Rock Partridge	Alectoris graeca	2	2	0	1	2	3	0	0	0	2
10	Q	Quail	Coturnix coturnix	3	3	0	0	1	1	0	0	0	1
10	CK	Cuckoo	Cuculus canorus	1	0	0	0	0	0	0	0	0	1
10	SI	Swift	Apus apus	0	0	0	0	0	0	0	0	0	1
10	AS	Alpine Swift	Apus melba	0	0	0	0	0	0	0	0	0	1
10	GS	Greater spotted Woodpecker	Dendrocopos major	0	0	3	0	0	0	0	0	1	0
10	G	Green Woodpecker	Picus viridus	1	1	2	0	0	0	0	0	1	0
10	S	Skylark	Alauda arvensis	3	3	0	0	1	1	0	0	0	0
10	HM	House Martin	Delichon urbica	0	0	0	0	0	0	0	0	0	1
10	CM	Crag Martin	Ptyonoprogne rupestris	0	0	0	0	0	0	0	0	0	0
10	WI	Water Pipit	Anthus spinoletta	3	3	0	0	0	0	0	0	0	2
10	TP	Tree Pipit	Anthus trivialis	1	2	1	0	0	0	0	0	1	1
10	PW	White Wagtail	Motacilla alba	0	1	0	0	0	0	0	0	0	0
10	GL	Grey Wagtail	Motacilla cinerea	0	1	0	0	0	0	3	0	0	0
10	WR	Wren	Troglodytes troglodytes	0	0	3	0	0	0	0	0	1	0
10	DI	Dipper	Cinclus cinclus	0	0	0	0	0	0	3	0	0	0
10	D	Dunnock	Prunella modularis	0	0	2	0	0	0	0	0	1	0
10	AA	Alpine Accentor	Prunella collaris	2	1	0	0	0	0	0	0	0	2
10	R	Robin	Erithacus rubecula	0	0	2	0	0	0	0	0	1	0
10	BX	Black Redstart	Phoenicurus ochruros	2	1	0	0	0	0	0	0	0	0
10	W	Wheatear	Oenanthe oenanthe	3	3	0	0	1	0	0	0	0	1
10	WH	Whinchat	Saxicola rubetra	3	3	0	0	1	0	0	0	0	1
10	RO	Rock Thrush	Monticola saxatilis	2	2	0	0	1	0	0	0	0	1
10	ST	Song Thrush	Turdus philomelos	0	0	2	0	0	1	0	0	1	0
10	M	Mistle Thrush	Turdus viscivorus	0	0	2	0	0	1	0	0	1	0
10	FF	Fieldfare	Turdus pilaris	1	0	2	0	0	1	0	0	1	0
10	B	Blackbird	Turdus merula	0	0	1	0	0	1	0	0	0	0
10	RZ	Ring Ouzel	Turdus torquatus	0	0	2	0	0	0	0	0	1	0
10	GW	Garden Warbler	Sylvia borin	0	0	1	0	0	0	0	0	1	1
10	BC	Blackcap	Sylvia atricapilla	0	0	1	0	0	0	0	0	1	0
10	LW	Lesser Whitethroat	Sylvia curruca	0	0	1	0	0	0	0	0	1	1
10	IW	Bonelliâ€šÃ„Ã´s Warbler	Phylloscopus bonelli	0	0	2	0	0	0	0	0	1	1
10	CC	Chiffchaff	Phylloscopos collybita	0	0	1	0	0	0	0	0	1	0
10	GC	Goldcrest	Regulus regulus	0	0	2	0	0	0	0	0	1	0
10	FC	Firecrest	Regulus ignicapillus	0	0	2	0	0	0	0	0	1	0
10	CT	Coal Tit	Periparus ater	0	0	3	0	0	0	0	0	1	0
10	BT	Blue Tit	Cyanistes caeruleus	0	0	2	0	0	0	0	0	1	0
10	CI	Crested Tit	Lophophanes cristatus	0	0	3	0	0	0	0	0	1	0
10	WT	Willow Tit	Poeciles montanus	0	0	3	0	0	0	0	0	1	0
10	LT	Long-tailed Tit	Aegithalos caudatus	0	0	1	0	0	0	0	0	1	0
10	NH	Nuthatch	Sitta europeae	0	0	3	0	0	0	0	0	1	0
10	WA	Wallcreeper	Tichodroma muraria	0	0	0	0	1	0	0	1	0	0
10	TC	Treecreeper	Certhia familiaris	0	0	3	0	0	0	0	0	1	0
10	RS	Red-backed Shrike	Lanius collurio	2	2	0	1	1	0	0	0	1	1
10	J	Jay	Garrulus glandarius	0	0	2	0	0	0	0	0	1	0
10	NC	Nutcracker	Nucifraga caryocatactes	0	0	2	0	0	0	0	0	1	1
10	CG	Chough	Pyrrhocorax pyrrhocorax	2	1	0	0	0	0	0	0	0	0
10	AC	Alpine Chough	Pyrrhocorax graculus	2	1	0	0	0	0	0	0	0	0
10	C	Crow	Corvus corone	1	1	0	0	0	0	0	0	0	0
10	RN	Raven	Corvus corax	1	1	0	0	0	0	0	0	0	0
10	MN	Snowfinch	Montifringilla nivalis	2	1	0	0	0	0	0	0	0	3
10	CH	Chaffinch	Fringella coelebs	0	0	1	0	0	1	0	0	1	0
10	LI	Linnet	Carduelis cannabina	1	1	0	0	0	0	0	0	0	0
10	LR	Redpoll	Carduelis flammea	1	1	0	1	0	0	0	0	0	0
10	GO	Goldfinch	Carduelis carduelis	1	1	0	0	0	0	0	0	0	0
10	SK	Siskin	Carduelis spinus	0	0	1	0	0	0	0	0	1	0
10	CF	Citril Finch	Carduelis citrinella	0	0	0	1	0	0	0	0	0	1
10	BF	Bullfinch	Pyrrhula pyrrhula	0	0	1	0	0	0	0	0	1	0
10	CR	Crossbill	Loxia curvirostra	0	0	1	0	0	0	0	0	1	1
10	Y	Yellowhammer	Emberiza citrinella	2	3	0	1	0	0	0	0	0	0
10	RU	Rock Bunting	Emberiza cia	1	1	1	0	0	0	0	0	1	0
11	LM	Lammergeier	Gypaetus barbatus	3	0	0	1	1	1	1	2	0	0
11	EA	Golden Eagle	Aquila chrysaetos	2	0	0	1	1	1	1	2	0	0
11	BZ	Buzzard	Buteo buteo	1	0	0	1	0	1	1	0	0	0
11	SH	Sparrowhawk	Accipiter nisus	0	0	1	2	0	1	1	0	1	0
11	K	Kestrel	Falco tinnunculus	2	0	0	1	0	1	1	2	0	0
11	PE	Peregrine falcon	Falco peregrinus	0	0	0	1	0	1	1	2	0	0
11	BG	Black Grouse	Tetrao tetrix	1	3	1	2	3	3	2	0	1	2
11	PT	Ptarmigan	Lagopus muta	1	3	0	2	3	3	2	0	0	2
11	RP	Rock Partridge	Alectoris graeca	2	3	0	2	3	3	1	1	0	2
11	Q	Quail	Coturnix coturnix	3	2	0	1	1	2	1	0	0	2
11	CK	Cuckoo	Cuculus canorus	0	0	0	1	1	0	1	0	1	0
11	SI	Swift	Apus apus	0	0	0	1	1	0	0	1	0	1
11	AS	Alpine Swift	Apus melba	0	0	0	1	1	0	0	1	0	0
11	GS	Greater spotted Woodpecker	Dendrocopos major	0	0	2	1	2	0	0	0	2	0
11	G	Green Woodpecker	Picus viridus	1	0	2	1	2	0	0	0	2	0
11	S	Skylark	Alauda arvensis	3	3	0	1	1	3	0	0	0	1
11	HM	House Martin	Delichon urbica	1	0	0	1	0	1	0	1	0	1
11	CM	Crag Martin	Ptyonoprogne rupestris	0	0	0	1	1	0	0	1	0	0
11	WI	Water Pipit	Anthus spinoletta	1	1	0	1	1	1	0	0	0	1
11	TP	Tree Pipit	Anthus trivialis	2	3	0	1	1	1	0	0	0	1
11	PW	White Wagtail	Motacilla alba	2	1	0	1	0	0	1	0	0	0
11	GL	Grey Wagtail	Motacilla cinerea	1	1	0	1	0	0	1	0	0	0
11	WR	Wren	Troglodytes troglodytes	0	0	1	1	0	0	0	0	1	0
11	DI	Dipper	Cinclus cinclus	0	0	0	1	0	0	1	0	0	0
11	D	Dunnock	Prunella modularis	0	0	1	1	0	0	0	0	1	0
11	AA	Alpine Accentor	Prunella collaris	0	0	0	1	1	0	0	0	0	0
11	R	Robin	Erithacus rubecula	0	0	1	1	0	0	0	0	1	0
11	BX	Black Redstart	Phoenicurus ochruros	1	1	0	1	0	0	0	0	0	0
11	W	Wheatear	Oenanthe oenanthe	2	2	0	1	1	0	0	0	0	1
11	WH	Whinchat	Saxicola rubetra	2	3	0	1	1	0	0	0	0	1
11	RO	Rock Thrush	Monticola saxatilis	2	2	0	1	1	0	0	1	0	1
11	ST	Song Thrush	Turdus philomelos	0	0	1	1	0	1	0	0	1	0
11	M	Mistle Thrush	Turdus viscivorus	1	0	1	1	0	1	0	0	1	0
11	FF	Fieldfare	Turdus pilaris	1	0	1	1	0	1	0	0	1	0
11	B	Blackbird	Turdus merula	0	0	1	1	0	1	0	0	1	0
11	RZ	Ring Ouzel	Turdus torquatus	1	1	1	1	0	1	0	0	1	1
11	GW	Garden Warbler	Sylvia borin	0	0	2	1	0	0	0	0	1	1
11	BC	Blackcap	Sylvia atricapilla	0	0	1	1	0	0	0	0	1	0
11	LW	Lesser Whitethroat	Sylvia curruca	0	0	2	1	0	0	0	0	1	1
11	IW	Bonelliâ€™s Warbler	Phylloscopus bonelli	0	0	1	1	0	0	0	0	1	1
11	CC	Chiffchaff	Phylloscopos collybita	0	0	1	1	0	0	0	0	1	0
11	GC	Goldcrest	Regulus regulus	0	0	1	1	0	0	0	0	1	0
11	FC	Firecrest	Regulus ignicapillus	0	0	1	1	0	0	0	0	1	0
11	CT	Coal Tit	Periparus ater	0	0	1	1	0	0	0	0	1	0
11	BT	Blue Tit	Cyanistes caeruleus	0	0	1	1	0	0	0	0	1	0
11	CI	Crested Tit	Lophophanes cristatus	0	0	2	1	0	0	0	0	1	0
11	WT	Willow Tit	Poeciles montanus	0	0	2	1	0	0	0	0	1	0
11	LT	Long-tailed Tit	Aegithalos caudatus	0	0	1	1	0	0	0	0	1	0
11	NH	Nuthatch	Sitta europeae	0	0	2	1	0	0	0	0	2	0
11	WA	Wallcreeper	Tichodroma muraria	0	0	0	1	1	0	0	1	0	1
11	TC	Treecreeper	Certhia familiaris	0	0	2	1	0	0	0	0	2	0
11	RS	Red-backed Shrike	Lanius collurio	3	2	0	1	1	0	0	0	0	1
11	J	Jay	Garrulus glandarius	0	0	1	1	0	1	0	0	1	0
11	NC	Nutcracker	Nucifraga caryocatactes	0	0	1	1	0	1	0	0	2	0
11	CG	Chough	Pyrrhocorax pyrrhocorax	1	0	0	1	0	1	0	0	0	0
11	AC	Alpine Chough	Pyrrhocorax gracilis	1	0	0	1	0	1	0	0	0	0
11	C	Crow	Corvus corone	1	0	0	1	0	1	0	0	0	0
11	RN	Raven	Corvus corax	1	0	0	1	0	1	0	0	0	0
11	MN	Snowfinch	Montifringilla nivalis	0	1	0	1	1	0	0	0	0	2
11	CH	Chaffinch	Fringella coelebs	1	0	1	1	0	0	0	0	1	0
11	LI	Linnet	Carduelis cannabina	2	1	0	1	1	0	0	0	0	0
11	LR	Redpoll	Carduelis flammea	0	0	1	1	0	0	0	0	1	0
11	GO	Goldfinch	Carduelis carduelis	2	1	0	1	1	0	0	0	0	0
11	SK	Siskin	Carduelis spinus	0	0	1	1	0	0	0	0	1	0
11	CF	Citril Finch	Carduelis citrinella	0	0	1	1	0	0	0	0	1	0
11	BF	Bullfinch	Pyrrhula pyrrhula	0	0	1	1	0	0	0	0	1	0
11	CR	Crossbill	Loxia curvirostra	0	0	1	1	0	0	0	0	2	0
11	Y	Yellowhammer	Emberiza citrinella	3	1	1	1	1	0	0	0	1	0
11	RU	Rock Bunting	Emberiza cia	0	0	1	1	1	0	0	0	1	0
12	LM	Lammergeier	Gypaetus barbatus	2	0	0	1	1	2	0	0	0	0
12	EA	Golden Eagle	Aquila chrysaetos	1	0	0	1	1	1	0	0	0	0
12	BZ	Buzzard	Buteo buteo	1	0	0	0	0	1	0	0	0	0
12	SH	Sparrowhawk	Accipiter nisus	0	0	0	1	1	2	0	0	0	0
12	K	Kestrel	Falco tinnunculus	1	1	0	0	1	0	0	0	0	0
12	PE	Peregrine falcon	Falco peregrinus	0	0	0	0	2	1	0	0	0	0
12	BG	Black Grouse	Tetrao tetrix	2	0	0	2	3	2	0	0	0	2
12	PT	Ptarmigan	Lagopus muta	0	0	0	2	2	0	0	0	0	3
12	RP	Rock Partridge	Alectoris graeca	2	0	0	2	2	0	0	0	0	0
12	Q	Quail	Coturnix coturnix	0	0	0	0	0	0	0	0	0	0
12	CK	Cuckoo	Cuculus canorus	1	1	0	0	0	0	0	0	0	0
12	SI	Swift	Apus apus	0	0	0	0	0	0	0	0	0	0
12	AS	Alpine Swift	Apus melba	0	0	0	0	1	0	0	2	0	0
12	GS	Greater spotted Woodpecker	Dendrocopos major	0	0	1	0	0	0	0	0	0	0
12	G	Green Woodpecker	Picus viridus	1	0	1	0	0	0	0	0	0	0
12	S	Skylark	Alauda arvensis	1	1	0	0	0	0	0	0	0	0
12	HM	House Martin	Delichon urbica	0	0	0	0	0	0	0	0	0	0
12	CM	Crag Martin	Ptyonoprogne rupestris	0	0	0	0	1	0	0	0	0	0
12	WI	Water Pipit	Anthus spinoletta	0	0	0	0	0	0	0	0	0	0
12	TP	Tree Pipit	Anthus trivialis	0	2	0	0	1	0	0	0	0	0
12	PW	White Wagtail	Motacilla alba	0	0	0	0	0	0	0	0	0	0
12	GL	Grey Wagtail	Motacilla cinerea	0	0	0	0	0	0	1	0	0	0
12	WR	Wren	Troglodytes troglodytes	0	0	1	0	0	0	0	0	0	0
12	DI	Dipper	Cinclus cinclus	0	0	0	0	0	0	2	0	0	0
12	D	Dunnock	Prunella modularis	0	0	0	0	0	0	0	0	0	0
12	AA	Alpine Accentor	Prunella collaris	0	0	0	1	1	0	0	0	0	0
12	R	Robin	Erithacus rubecula	0	0	0	0	0	0	0	0	0	0
12	BX	Black Redstart	Phoenicurus ochruros	0	0	0	0	1	0	0	0	0	0
12	W	Wheatear	Oenanthe oenanthe	0	0	0	1	1	0	0	0	0	0
12	WH	Whinchat	Saxicola rubetra	2	3	0	2	2	0	0	0	0	0
12	RO	Rock Thrush	Monticola saxatilis	0	0	0	2	2	0	0	0	0	0
12	ST	Song Thrush	Turdus philomelos	0	0	0	0	0	0	0	0	0	0
12	M	Mistle Thrush	Turdus viscivorus	0	0	0	0	0	0	0	0	0	0
12	FF	Fieldfare	Turdus pilaris	0	0	0	0	0	0	0	0	0	0
12	B	Blackbird	Turdus merula	0	0	0	0	0	0	0	0	0	0
12	RZ	Ring Ouzel	Turdus torquatus	0	2	0	2	2	0	0	0	0	2
12	GW	Garden Warbler	Sylvia borin	0	0	1	0	0	0	0	0	0	0
12	BC	Blackcap	Sylvia atricapilla	0	0	1	0	0	0	0	0	0	0
12	LW	Lesser Whitethroat	Sylvia curruca	0	0	0	1	1	0	0	0	0	0
12	IW	Bonelli’s Warbler	Phylloscopus bonelli	0	0	1	0	0	0	0	0	0	0
12	CC	Chiffchaff	Phylloscopos collybita	0	0	0	0	0	0	0	0	0	0
12	GC	Goldcrest	Regulus regulus	0	0	1	0	0	0	0	0	0	0
12	FC	Firecrest	Regulus ignicapillus	0	0	1	0	0	0	0	0	0	0
12	CT	Coal Tit	Periparus ater	0	0	0	0	0	0	0	0	0	0
12	BT	Blue Tit	Cyanistes caeruleus	0	0	0	0	0	0	0	0	0	0
12	CI	Crested Tit	Lophophanes cristatus	0	0	0	0	0	0	0	0	0	0
12	WT	Willow Tit	Poeciles montanus	0	0	0	0	0	0	0	0	0	0
12	LT	Long-tailed Tit	Aegithalos caudatus	0	0	1	0	0	0	0	0	0	0
12	NH	Nuthatch	Sitta europeae	0	0	0	0	0	0	0	0	0	0
12	WA	Wallcreeper	Tichodroma muraria	0	0	0	0	2	0	0	0	0	0
12	TC	Treecreeper	Certhia familiaris	0	0	1	0	0	0	0	0	0	0
12	RS	Red-backed Shrike	Lanius collurio	1	1	0	0	1	0	0	0	0	0
12	J	Jay	Garrulus glandarius	0	0	0	0	0	1	0	0	0	0
12	NC	Nutcracker	Nucifraga caryocatactes	0	0	2	1	1	0	0	0	0	0
12	CG	Chough	Pyrrhocorax pyrrhocorax	0	0	0	0	0	0	0	0	0	0
12	AC	Alpine Chough	Pyrrhocorax gracilis	0	0	0	0	1	0	0	0	0	0
12	C	Crow	Corvus corone	0	0	0	0	0	1	0	0	0	0
12	RN	Raven	Corvus corax	0	0	0	0	0	1	0	0	0	0
12	MN	Snowfinch	Montifringilla nivalis	0	0	0	0	1	0	0	0	0	0
12	CH	Chaffinch	Fringella coelebs	0	0	0	0	0	0	0	0	0	0
12	LI	Linnet	Carduelis cannabina	1	0	0	0	0	0	0	0	0	0
12	LR	Redpoll	Carduelis flammea	0	1	0	0	0	0	0	0	0	0
12	GO	Goldfinch	Carduelis carduelis	0	0	0	0	0	0	0	0	0	0
12	SK	Siskin	Carduelis spinus	0	0	0	0	0	0	0	0	0	0
12	CF	Citril Finch	Carduelis citrinella	1	2	0	2	1	0	0	0	0	0
12	BF	Bullfinch	Pyrrhula pyrrhula	0	0	1	0	0	0	0	0	0	0
12	CR	Crossbill	Loxia curvirostra	0	0	1	0	0	0	0	0	0	0
12	Y	Yellowhammer	Emberiza citrinella	0	2	0	0	0	0	0	0	0	0
12	RU	Rock Bunting	Emberiza cia	0	1	0	2	2	0	0	0	0	0
13	LM	Lammergeier	Gypaetus barbatus	2	0	0	2	2	3	2	0	0	0
13	EA	Golden Eagle	Aquila chrysaetos	2	1	0	2	2	3	2	0	0	0
13	BZ	Buzzard	Buteo buteo	2	0	1	1	1	3	2	0	1	0
13	SH	Sparrowhawk	Accipiter nisus	0	0	2	1	1	3	0	0	2	0
13	K	Kestrel	Falco tinnunculus	1	0	0	1	1	3	2	0	0	0
13	PE	Peregrine falcon	Falco peregrinus	0	0	0	1	1	3	2	0	0	0
13	BG	Black Grouse	Tetrao tetrix	1	2	1	3	3	2	0	0	2	0
13	PT	Ptarmigan	Lagopus muta	1	1	0	3	3	2	0	0	0	2
13	RP	Rock Partridge	Alectoris graeca	2	1	0	3	3	2	0	0	0	3
13	Q	Quail	Coturnix coturnix	1	2	0	2	1	1	0	0	0	2
13	CK	Cuckoo	Cuculus canorus	0	0	1	1	1	0	0	0	0	1
13	SI	Swift	Apus apus	1	1	0	0	0	0	2	0	0	1
13	AS	Alpine Swift	Apus melba	1	1	0	1	1	0	2	0	0	2
13	GS	Greater spotted Woodpecker	Dendrocopos major	0	0	2	1	1	0	0	0	0	0
13	G	Green Woodpecker	Picus viridus	0	0	2	1	1	0	0	0	0	0
13	S	Skylark	Alauda arvensis	1	1	0	2	1	0	0	0	0	0
13	HM	House Martin	Delichon urbica	1	0	0	0	0	0	2	0	0	2
13	CM	Crag Martin	Ptyonoprogne rupestris	1	0	0	0	0	0	2	0	0	0
13	WI	Water Pipit	Anthus spinoletta	1	2	0	1	1	0	0	0	0	0
13	TP	Tree Pipit	Anthus trivialis	1	2	0	1	1	0	0	0	0	0
13	PW	White Wagtail	Motacilla alba	1	0	0	0	0	0	0	0	0	0
13	GL	Grey Wagtail	Motacilla cinerea	0	0	0	1	0	1	1	0	0	0
13	WR	Wren	Troglodytes troglodytes	0	0	1	0	0	0	0	0	0	0
13	DI	Dipper	Cinclus cinclus	0	0	0	2	2	1	1	0	0	0
13	D	Dunnock	Prunella modularis	0	0	0	1	0	0	0	0	0	0
13	AA	Alpine Accentor	Prunella collaris	0	0	0	1	1	0	0	0	0	0
13	R	Robin	Erithacus rubecula	0	0	1	0	0	0	0	0	0	0
13	BX	Black Redstart	Phoenicurus ochruros	1	0	0	0	0	0	0	0	0	0
13	W	Wheatear	Oenanthe oenanthe	2	1	0	3	2	0	0	0	0	1
13	WH	Whinchat	Saxicola rubetra	2	1	0	2	1	0	0	0	0	1
13	RO	Rock Thrush	Monticola saxatilis	2	1	0	3	3	0	0	0	0	2
13	ST	Song Thrush	Turdus philomelos	0	0	1	1	0	0	0	0	0	0
13	M	Mistle Thrush	Turdus viscivorus	0	0	1	2	1	0	0	0	0	0
13	FF	Fieldfare	Turdus pilaris	0	0	1	1	1	0	0	0	0	0
13	B	Blackbird	Turdus merula	0	0	1	0	0	0	0	0	0	0
13	RZ	Ring Ouzel	Turdus torquatus	1	1	1	3	3	0	0	0	0	1
13	GW	Garden Warbler	Sylvia borin	0	0	1	2	1	0	0	0	0	0
13	BC	Blackcap	Sylvia atricapilla	0	0	1	1	0	0	0	0	0	0
13	LW	Lesser Whitethroat	Sylvia curruca	0	0	1	2	0	0	0	0	0	0
13	IW	Bonelliâ€™s Warbler	Phylloscopus bonelli	0	0	1	1	0	0	0	0	0	0
13	CC	Chiffchaff	Phylloscopos collybita	0	0	1	1	0	0	0	0	0	0
13	GC	Goldcrest	Regulus regulus	0	0	1	0	0	0	0	0	1	0
13	FC	Firecrest	Regulus ignicapillus	0	0	1	0	0	0	0	0	1	0
13	CT	Coal Tit	Periparus ater	0	0	1	0	0	0	0	0	1	0
13	BT	Blue Tit	Cyanistes caeruleus	0	0	1	0	0	0	0	0	1	0
13	CI	Crested Tit	Lophophanes cristatus	0	0	1	2	0	0	0	0	1	0
13	WT	Willow Tit	Poeciles montanus	0	0	1	2	0	0	0	0	1	0
13	LT	Long-tailed Tit	Aegithalos caudatus	0	0	1	1	0	0	0	0	1	0
13	NH	Nuthatch	Sitta europaea	0	0	1	1	0	0	0	0	0	0
13	WA	Wallcreeper	Tichodroma muraria	0	0	0	2	2	0	0	0	0	0
13	TC	Treecreeper	Certhia familiaris	0	0	1	1	0	0	0	0	1	0
13	RS	Red-backed Shrike	Lanius collurio	1	0	0	3	1	0	0	0	0	2
13	J	Jay	Garrulus glandarius	0	0	1	1	0	0	0	0	1	0
13	NC	Nutcracker	Nucifraga caryocatactes	0	0	2	3	1	0	0	0	1	0
13	CG	Chough	Pyrrhocorax pyrrhocorax	0	0	0	3	1	0	0	0	0	0
13	AC	Alpine Chough	Pyrrhocorax graculus	0	0	0	2	1	0	0	0	0	0
13	C	Crow	Corvus corone	0	0	0	0	1	0	1	0	0	0
13	RN	Raven	Corvus corax	1	0	0	2	2	0	0	0	0	0
13	MN	Snowfinch	Montifringilla nivalis	0	0	0	2	1	0	0	0	0	1
13	CH	Chaffinch	Fringella coelebs	0	0	2	1	1	0	0	0	0	0
13	LI	Linnet	Carduelis cannabina	1	1	0	1	0	0	0	0	0	0
13	LR	Redpoll	Carduelis flammea	0	0	0	1	0	0	0	0	0	0
13	GO	Goldfinch	Carduelis carduelis	0	0	1	0	0	0	0	0	0	0
13	SK	Siskin	Carduelis spinus	0	0	1	1	0	0	0	0	1	0
13	CF	Citril Finch	Carduelis citrinella	0	0	1	3	1	0	0	0	0	1
13	BF	Bullfinch	Pyrrhula pyrrhula	0	0	2	2	0	0	0	0	0	0
13	CR	Crossbill	Loxia curvirostra	0	0	2	1	0	0	0	0	1	0
13	Y	Yellowhammer	Emberiza citrinella	1	0	0	2	1	0	0	0	0	1
13	RU	Rock Bunting	Emberiza cia	1	1	0	2	1	0	0	0	0	1
14	LM	Lammergeier	Gypaetus barbatus	3	0	0	3	3	3	3	2	0	0
14	EA	Golden Eagle	Aquila chrysaetos	2	0	0	3	3	3	3	2	0	0
14	BZ	Buzzard	Buteo buteo	1	0	2	1	1	3	3	0	2	0
14	SH	Sparrowhawk	Accipiter nisus	0	0	1	2	2	3	3	0	3	0
14	K	Kestrel	Falco tinnunculus	2	0	0	0	1	2	3	2	0	0
14	PE	Peregrine falcon	Falco peregrinus	0	0	0	1	3	3	3	3	0	0
14	BG	Black Grouse	Tetrao tetrix	0	2	3	3	3	3	0	0	3	3
14	PT	Ptarmigan	Lagopus muta	1	3	0	3	3	3	0	3	0	2
14	RP	Rock Partridge	Alectoris graeca	2	3	0	3	3	3	0	3	0	2
14	Q	Quail	Coturnix coturnix	2	3	0	3	1	3	0	1	0	2
14	CK	Cuckoo	Cuculus canorus	0	0	0	1	0	0	1	0	2	1
14	SI	Swift	Apus apus	1	0	0	0	2	0	3	1	0	2
14	AS	Alpine Swift	Apus melba	1	0	0	0	2	0	3	2	0	2
14	GS	Greater spotted Woodpecker	Dendrocopos major	0	0	1	1	0	0	0	0	3	0
14	G	Green Woodpecker	Picus viridus	0	0	2	2	0	0	0	0	3	0
14	S	Skylark	Alauda arvensis	2	3	0	3	2	3	1	0	0	3
14	HM	House Martin	Delichon urbica	0	0	0	0	1	0	3	0	0	2
14	CM	Crag Martin	Ptyonoprogne rupestris	0	0	0	0	1	0	3	1	0	2
14	WI	Water Pipit	Anthus spinoletta	2	3	0	1	2	0	1	0	0	3
14	TP	Tree Pipit	Anthus trivialis	0	0	1	1	0	1	0	0	2	1
14	PW	White Wagtail	Motacilla alba	3	3	0	0	0	0	1	0	0	2
14	GL	Grey Wagtail	Motacilla cinerea	1	2	0	0	0	0	2	0	0	2
14	WR	Wren	Troglodytes troglodytes	0	0	1	0	0	0	0	0	2	0
14	DI	Dipper	Cinclus cinclus	0	1	0	1	0	0	2	0	0	3
14	D	Dunnock	Prunella modularis	0	0	1	1	1	0	0	0	2	0
14	AA	Alpine Accentor	Prunella collaris	0	0	0	0	2	0	0	0	0	2
14	R	Robin	Erithacus rubecula	0	0	1	0	0	1	0	0	1	0
14	BX	Black Redstart	Phoenicurus ochruros	0	0	0	0	0	0	0	1	0	0
14	W	Wheatear	Oenanthe oenanthe	2	2	0	2	1	0	1	0	0	3
14	WH	Whinchat	Saxicola rubetra	3	3	0	2	1	0	1	0	1	2
14	RO	Rock Thrush	Monticola saxatilis	2	2	0	1	2	0	1	1	0	2
14	ST	Song Thrush	Turdus philomelos	0	0	1	0	0	1	0	0	2	0
14	M	Mistle Thrush	Turdus viscivorus	1	0	1	0	0	1	0	0	2	0
14	FF	Fieldfare	Turdus pilaris	1	0	1	0	0	1	1	0	2	0
14	B	Blackbird	Turdus merula	0	0	0	0	0	1	0	0	2	0
14	RZ	Ring Ouzel	Turdus torquatus	1	1	0	2	2	0	1	0	2	1
14	GW	Garden Warbler	Sylvia borin	0	0	1	0	1	0	1	0	3	0
14	BC	Blackcap	Sylvia atricapilla	0	0	0	0	0	0	0	0	2	0
14	LW	Lesser Whitethroat	Sylvia curruca	0	1	1	1	2	0	1	0	1	0
14	IW	Bonelliâ€™s Warbler	Phylloscopus bonelli	0	0	0	1	2	0	0	0	3	0
14	CC	Chiffchaff	Phylloscopos collybita	0	0	1	0	0	0	0	0	3	0
14	GC	Goldcrest	Regulus regulus	0	0	0	1	0	0	0	0	3	1
14	FC	Firecrest	Regulus ignicapillus	0	0	0	0	0	0	0	0	3	1
14	CT	Coal Tit	Periparus ater	0	0	1	0	0	0	0	0	3	0
14	BT	Blue Tit	Cyanistes caeruleus	0	0	1	0	0	0	0	0	3	0
14	CI	Crested Tit	Lophophanes cristatus	0	0	2	1	0	0	0	0	3	0
14	WT	Willow Tit	Poeciles montanus	0	0	2	1	0	0	0	0	3	0
14	LT	Long-tailed Tit	Aegithalos caudatus	0	0	2	0	0	0	0	0	3	0
14	NH	Nuthatch	Sitta europeae	0	0	3	3	0	0	0	0	3	0
14	WA	Wallcreeper	Tichodroma muraria	0	0	0	0	3	0	0	3	0	1
14	TC	Treecreeper	Certhia familiaris	0	0	3	3	0	0	0	0	3	0
14	RS	Red-backed Shrike	Lanius collurio	2	1	0	3	2	0	0	0	2	2
14	J	Jay	Garrulus glandarius	0	0	2	1	0	0	0	0	3	0
14	NC	Nutcracker	Nucifraga caryocatactes	0	0	1	1	0	0	0	0	3	0
14	CG	Chough	Pyrrhocorax pyrrhocorax	0	0	0	0	3	0	2	0	0	1
14	AC	Alpine Chough	Pyrrhocorax gracilis	0	0	0	0	3	0	2	0	0	1
14	C	Crow	Corvus corone	0	0	1	0	0	1	2	0	1	0
14	RN	Raven	Corvus corax	0	0	0	0	3	0	2	2	0	1
14	MN	Snowfinch	Montifringilla nivalis	0	1	0	0	1	0	0	0	0	3
14	CH	Chaffinch	Fringella coelebs	0	0	0	0	0	1	0	0	2	0
14	LI	Linnet	Carduelis cannabina	1	1	0	1	1	0	0	0	2	1
14	LR	Redpoll	Carduelis flammea	1	1	0	1	1	0	0	0	2	1
14	GO	Goldfinch	Carduelis carduelis	1	1	0	2	1	1	0	0	2	0
14	SK	Siskin	Carduelis spinus	0	0	3	0	0	1	0	0	2	0
14	CF	Citril Finch	Carduelis citrinella	1	2	0	2	2	0	0	0	2	1
14	BF	Bullfinch	Pyrrhula pyrrhula	0	0	1	1	0	0	0	0	2	0
14	CR	Crossbill	Loxia curvirostra	0	0	1	1	0	1	0	0	2	1
14	Y	Yellowhammer	Emberiza citrinella	2	2	0	3	2	0	0	0	0	3
14	RU	Rock Bunting	Emberiza cia	0	1	0	1	1	0	0	3	0	2
15	LM	Lammergeier	Gypaetus barbatus	3	0	0	1	1	2	1	0	0	0
15	EA	Golden Eagle	Aquila chrysaetos	1	1	0	1	1	2	2	0	0	0
15	BZ	Buzzard	Buteo buteo	1	1	1	0	0	1	1	0	0	0
15	SH	Sparrowhawk	Accipiter nisus	0	0	1	0	0	1	0	0	0	0
15	K	Kestrel	Falco tinnunculus	1	1	0	0	0	0	0	0	0	0
15	PE	Peregrine falcon	Falco peregrinus	0	0	0	1	2	2	1	2	0	0
15	BG	Black Grouse	Tetrao tetrix	3	2	2	1	2	1	2	0	0	0
15	PT	Ptarmigan	Lagopus muta	0	1	0	0	1	1	2	0	0	2
15	RP	Rock Partridge	Alectoris graeca	1	0	0	0	1	1	1	0	0	0
15	Q	Quail	Coturnix coturnix	0	0	0	1	0	1	1	0	0	0
15	CK	Cuckoo	Cuculus canorus	0	1	1	0	0	0	0	0	0	0
15	SI	Swift	Apus apus	0	0	0	1	0	0	1	0	0	0
15	AS	Alpine Swift	Apus melba	0	0	0	1	0	0	1	0	0	0
15	GS	Greater spotted Woodpecker	Dendrocopos major	0	0	1	0	0	0	0	0	0	0
15	G	Green Woodpecker	Picus viridus	1	1	2	0	1	0	0	0	0	0
15	S	Skylark	Alauda arvensis	1	1	0	0	1	0	0	0	0	0
15	HM	House Martin	Delichon urbica	1	0	0	2	0	0	0	0	0	0
15	CM	Crag Martin	Ptyonoprogne rupestris	0	0	0	1	0	0	0	0	0	0
15	WI	Water Pipit	Anthus spinoletta	1	2	0	0	1	0	1	0	0	0
15	TP	Tree Pipit	Anthus trivialis	2	1	2	0	1	0	0	0	0	0
15	PW	White Wagtail	Motacilla alba	1	1	0	1	0	0	0	0	0	0
15	GL	Grey Wagtail	Motacilla cinerea	0	0	0	0	0	0	1	0	0	0
15	WR	Wren	Troglodytes troglodytes	0	0	0	0	0	0	0	0	0	0
15	DI	Dipper	Cinclus cinclus	0	0	0	0	0	0	1	0	0	0
15	D	Dunnock	Prunella modularis	0	0	0	0	0	0	0	0	0	0
15	AA	Alpine Accentor	Prunella collaris	0	0	0	0	0	0	0	0	0	1
15	R	Robin	Erithacus rubecula	0	0	0	0	0	0	0	0	0	0
15	BX	Black Redstart	Phoenicurus ochruros	0	1	0	0	0	0	0	0	0	0
15	W	Wheatear	Oenanthe oenanthe	0	1	0	0	1	0	0	0	0	0
15	WH	Whinchat	Saxicola rubetra	2	2	0	0	1	0	1	0	0	0
15	RO	Rock Thrush	Monticola saxatilis	1	1	0	0	1	0	1	1	0	0
15	ST	Song Thrush	Turdus philomelos	0	0	0	0	0	1	1	0	0	0
15	M	Mistle Thrush	Turdus viscivorus	1	1	1	0	0	1	0	0	0	0
15	FF	Fieldfare	Turdus pilaris	2	2	0	0	1	1	0	0	0	0
15	B	Blackbird	Turdus merula	0	0	0	0	0	0	0	0	0	0
15	RZ	Ring Ouzel	Turdus torquatus	2	2	2	0	1	1	0	0	0	1
15	GW	Garden Warbler	Sylvia borin	0	0	1	0	0	0	0	0	0	0
15	BC	Blackcap	Sylvia atricapilla	0	0	0	0	0	0	0	0	0	0
15	LW	Lesser Whitethroat	Sylvia curruca	0	0	0	0	0	0	0	0	0	0
15	IW	Bonelliâ€™s Warbler	Phylloscopus bonelli	0	0	2	0	0	0	0	0	0	0
15	CC	Chiffchaff	Phylloscopos collybita	0	0	0	0	0	0	0	0	0	1
15	GC	Goldcrest	Regulus regulus	0	0	0	0	0	0	0	0	0	0
15	FC	Firecrest	Regulus ignicapillus	0	0	0	0	0	0	0	0	0	0
15	CT	Coal Tit	Periparus ater	0	0	0	0	0	0	0	0	0	0
15	BT	Blue Tit	Cyanistes caeruleus	0	0	0	0	0	0	0	0	0	0
15	CI	Crested Tit	Lophophanes cristatus	0	0	1	0	0	0	0	0	0	0
15	WT	Willow Tit	Poeciles montanus	0	0	1	0	0	0	0	0	0	0
15	LT	Long-tailed Tit	Aegithalos caudatus	0	0	1	0	0	0	0	0	0	0
15	NH	Nuthatch	Sitta europeae	0	0	0	0	0	0	0	0	0	0
15	WA	Wallcreeper	Tichodroma muraria	0	0	0	0	0	0	0	1	0	0
15	TC	Treecreeper	Certhia familiaris	0	0	1	0	0	0	0	0	0	0
15	RS	Red-backed Shrike	Lanius collurio	2	1	0	0	1	0	0	0	0	0
15	J	Jay	Garrulus glandarius	0	0	0	0	0	1	0	0	0	0
15	NC	Nutcracker	Nucifraga caryocatactes	0	0	0	0	0	0	0	0	0	0
15	CG	Chough	Pyrrhocorax pyrrhocorax	2	1	0	0	1	0	0	0	0	1
15	AC	Alpine Chough	Pyrrhocorax gracilis	2	1	0	0	1	0	0	0	0	0
15	C	Crow	Corvus corone	0	0	0	0	0	1	0	0	0	0
15	RN	Raven	Corvus corax	0	0	0	0	0	1	0	0	0	0
15	MN	Snowfinch	Montifringilla nivalis	0	0	0	0	0	0	0	0	0	1
15	CH	Chaffinch	Fringella coelebs	0	0	0	0	0	0	0	0	0	0
15	LI	Linnet	Carduelis cannabina	2	2	0	0	1	0	0	0	0	0
15	LR	Redpoll	Carduelis flammea	0	0	0	0	0	0	0	0	0	0
15	GO	Goldfinch	Carduelis carduelis	1	0	0	0	0	0	0	0	0	0
15	SK	Siskin	Carduelis spinus	0	0	0	0	0	0	0	0	0	0
15	CF	Citril Finch	Carduelis citrinella	2	1	0	0	0	0	0	0	0	0
15	BF	Bullfinch	Pyrrhula pyrrhula	0	0	0	0	0	0	0	0	0	0
15	CR	Crossbill	Loxia curvirostra	0	0	0	0	0	0	0	0	0	0
15	Y	Yellowhammer	Emberiza citrinella	1	1	0	1	0	0	0	0	0	0
15	RU	Rock Bunting	Emberiza cia	0	0	0	0	0	0	0	0	0	0
16	LM	Lammergeier	Gypaetus barbatus	1	0	1	2	2	2	2	0	0	0
16	EA	Golden Eagle	Aquila chrysaetos	0	0	1	2	2	2	2	0	0	0
16	BZ	Buzzard	Buteo buteo	0	0	1	1	0	1	0	0	0	0
16	SH	Sparrowhawk	Accipiter nisus	0	0	1	1	0	1	0	0	0	0
16	K	Kestrel	Falco tinnunculus	0	0	0	0	0	0	0	0	0	0
16	PE	Peregrine falcon	Falco peregrinus	0	0	0	2	2	2	1	1	0	0
16	BG	Black Grouse	Tetrao tetrix	2	1	0	2	2	1	2	0	0	2
16	PT	Ptarmigan	Lagopus muta	1	2	0	2	2	0	2	0	1	3
16	RP	Rock Partridge	Alectoris graeca	2	1	0	2	2	0	2	0	1	1
16	Q	Quail	Coturnix coturnix	0	1	0	1	0	1	0	0	1	2
16	CK	Cuckoo	Cuculus canorus	0	0	1	0	0	0	0	0	0	1
16	SI	Swift	Apus apus	0	0	0	0	0	0	1	1	0	2
16	AS	Alpine Swift	Apus melba	0	0	0	0	0	0	1	1	0	1
16	GS	Greater spotted Woodpecker	Dendrocopos major	0	0	2	1	0	0	0	0	0	0
16	G	Green Woodpecker	Picus viridus	1	0	2	0	0	0	0	0	0	0
16	S	Skylark	Alauda arvensis	2	1	0	0	0	0	0	0	1	0
16	HM	House Martin	Delichon urbica	1	0	0	0	0	0	0	0	0	1
16	CM	Crag Martin	Ptyonoprogne rupestris	0	0	0	0	0	0	0	0	0	1
16	WI	Water Pipit	Anthus spinoletta	1	1	0	0	0	0	0	0	1	1
16	TP	Tree Pipit	Anthus trivialis	1	1	1	0	0	0	0	0	1	2
16	PW	White Wagtail	Motacilla alba	1	0	0	0	1	0	0	0	0	0
16	GL	Grey Wagtail	Motacilla cinerea	0	0	0	0	1	0	0	0	0	0
16	WR	Wren	Troglodytes troglodytes	0	0	1	0	0	0	0	0	0	0
16	DI	Dipper	Cinclus cinclus	0	0	0	0	1	0	0	0	0	1
16	D	Dunnock	Prunella modularis	0	0	1	0	0	0	0	0	0	1
16	AA	Alpine Accentor	Prunella collaris	0	0	0	0	0	0	0	0	0	3
16	R	Robin	Erithacus rubecula	0	0	1	0	0	0	0	0	0	0
16	BX	Black Redstart	Phoenicurus ochruros	0	0	0	0	0	0	0	0	0	0
16	W	Wheatear	Oenanthe oenanthe	1	1	0	1	0	0	0	0	1	2
16	WH	Whinchat	Saxicola rubetra	1	1	0	1	0	0	0	0	1	1
16	RO	Rock Thrush	Monticola saxatilis	0	0	0	0	0	1	0	0	0	1
16	ST	Song Thrush	Turdus philomelos	1	0	1	0	0	0	0	0	0	1
16	M	Mistle Thrush	Turdus viscivorus	1	0	1	0	0	0	0	0	0	0
16	FF	Fieldfare	Turdus pilaris	1	0	1	0	0	0	0	0	0	0
16	B	Blackbird	Turdus merula	1	0	1	0	0	0	0	0	0	0
16	RZ	Ring Ouzel	Turdus torquatus	1	0	1	0	0	0	0	0	0	0
16	GW	Garden Warbler	Sylvia borin	0	0	1	0	0	0	0	0	0	2
16	BC	Blackcap	Sylvia atricapilla	0	0	1	0	0	0	0	0	0	1
16	LW	Lesser Whitethroat	Sylvia curruca	0	0	1	0	0	0	0	0	1	2
16	IW	Bonelliâ€™s Warbler	Phylloscopus bonelli	0	0	0	0	0	0	0	0	0	2
16	CC	Chiffchaff	Phylloscopos collybita	0	0	0	0	0	0	0	0	0	1
16	GC	Goldcrest	Regulus regulus	0	0	0	0	0	0	0	0	0	0
16	FC	Firecrest	Regulus ignicapillus	0	0	0	0	0	0	0	0	0	0
16	CT	Coal Tit	Periparus ater	0	0	0	0	0	0	0	0	0	0
16	BT	Blue Tit	Cyanistes caeruleus	0	0	0	0	0	0	0	0	0	0
16	CI	Crested Tit	Lophophanes cristatus	0	0	0	0	0	0	0	0	0	0
16	WT	Willow Tit	Poeciles montanus	0	0	0	0	0	0	0	0	0	0
16	LT	Long-tailed Tit	Aegithalos caudatus	0	0	0	0	0	0	0	0	0	0
16	NH	Nuthatch	Sitta europeae	0	0	1	0	0	0	0	0	0	0
16	WA	Wallcreeper	Tichodroma muraria	0	0	0	0	1	0	0	1	0	0
16	TC	Treecreeper	Certhia familiaris	0	0	1	0	0	0	0	0	0	0
16	RS	Red-backed Shrike	Lanius collurio	1	0	1	1	0	0	0	0	1	2
16	J	Jay	Garrulus glandarius	1	0	0	0	0	1	0	0	0	0
16	NC	Nutcracker	Nucifraga caryocatactes	1	0	0	0	0	1	0	0	0	0
16	CG	Chough	Pyrrhocorax pyrrhocorax	1	2	0	0	0	2	0	0	1	1
16	AC	Alpine Chough	Pyrrhocorax gracilis	0	0	0	0	0	0	0	0	0	1
16	C	Crow	Corvus corone	1	0	0	0	0	1	0	0	0	0
16	RN	Raven	Corvus corax	1	0	0	0	0	1	0	1	0	0
16	MN	Snowfinch	Montifringilla nivalis	1	0	0	0	0	0	0	0	0	3
16	CH	Chaffinch	Fringella coelebs	1	0	0	0	0	0	0	0	0	0
16	LI	Linnet	Carduelis cannabina	0	0	0	0	0	0	0	0	1	1
16	LR	Redpoll	Carduelis flammea	0	0	1	0	0	0	0	0	0	0
16	GO	Goldfinch	Carduelis carduelis	1	0	0	0	0	0	0	0	0	0
16	SK	Siskin	Carduelis spinus	0	0	1	0	0	0	0	0	0	0
16	CF	Citril Finch	Carduelis citrinella	0	0	1	0	0	0	0	0	0	1
16	BF	Bullfinch	Pyrrhula pyrrhula	0	0	0	0	0	0	0	0	0	0
16	CR	Crossbill	Loxia curvirostra	0	0	1	0	0	1	0	0	0	0
16	Y	Yellowhammer	Emberiza citrinella	1	0	1	0	0	0	0	0	1	0
16	RU	Rock Bunting	Emberiza cia	1	0	0	1	0	0	0	0	1	0
17	LM	Lammergeier	Gypaetus barbatus	3	0	0	1	2	1	1	0	0	1
17	EA	Golden Eagle	Aquila chrysaetos	2	0	0	1	2	1	1	0	0	1
17	BZ	Buzzard	Buteo buteo	1	0	0	0	1	0	1	0	0	0
17	SH	Sparrowhawk	Accipiter nisus	0	0	0	0	0	1	1	0	0	0
17	K	Kestrel	Falco tinnunculus	1	0	0	0	2	0	1	0	0	1
17	PE	Peregrine falcon	Falco peregrinus	0	0	0	0	2	0	1	0	0	0
17	BG	Black Grouse	Tetrao tetrix	1	2	1	2	3	1	1	1	1	1
17	PT	Ptarmigan	Lagopus muta	0	0	0	2	3	3	1	1	0	1
17	RP	Rock Partridge	Alectoris graeca	2	1	0	2	2	3	1	1	0	0
17	Q	Quail	Coturnix coturnix	1	1	0	1	0	1	0	0	0	0
17	CK	Cuckoo	Cuculus canorus	0	0	0	0	0	0	0	0	0	0
17	SI	Swift	Apus apus	0	0	0	0	0	0	1	0	0	0
17	AS	Alpine Swift	Apus melba	0	0	0	0	0	0	1	0	0	0
17	GS	Greater spotted Woodpecker	Dendrocopos major	0	0	0	0	0	0	0	0	1	0
17	G	Green Woodpecker	Picus viridus	0	0	0	0	0	0	0	0	1	0
17	S	Skylark	Alauda arvensis	1	1	0	0	0	2	0	0	0	0
17	HM	House Martin	Delichon urbica	0	0	0	0	0	0	0	0	0	0
17	CM	Crag Martin	Ptyonoprogne rupestris	0	0	0	0	0	0	0	0	0	0
17	WI	Water Pipit	Anthus spinoletta	0	1	0	0	0	0	0	0	0	1
17	TP	Tree Pipit	Anthus trivialis	2	1	0	0	0	0	0	0	0	1
17	PW	White Wagtail	Motacilla alba	1	0	0	0	0	0	1	0	0	0
17	GL	Grey Wagtail	Motacilla cinerea	1	0	0	0	0	0	2	0	0	0
17	WR	Wren	Troglodytes troglodytes	0	0	0	0	0	0	0	0	0	0
17	DI	Dipper	Cinclus cinclus	0	0	0	0	0	0	2	0	0	0
17	D	Dunnock	Prunella modularis	0	0	0	0	0	0	0	0	0	0
17	AA	Alpine Accentor	Prunella collaris	0	0	0	0	0	0	0	0	0	0
17	R	Robin	Erithacus rubecula	0	0	0	0	0	0	0	0	0	0
17	BX	Black Redstart	Phoenicurus ochruros	1	0	0	0	0	0	0	0	0	0
17	W	Wheatear	Oenanthe oenanthe	0	0	0	0	0	0	0	0	0	0
17	WH	Whinchat	Saxicola rubetra	2	0	0	0	0	0	0	0	0	0
17	RO	Rock Thrush	Monticola saxatilis	0	0	0	0	0	0	0	0	0	0
17	ST	Song Thrush	Turdus philomelos	0	0	0	0	0	0	0	0	0	0
17	M	Mistle Thrush	Turdus viscivorus	1	0	0	0	0	0	0	0	0	0
17	FF	Fieldfare	Turdus pilaris	0	0	0	0	0	0	0	0	0	0
17	B	Blackbird	Turdus merula	0	0	0	0	0	0	0	0	0	0
17	RZ	Ring Ouzel	Turdus torquatus	1	0	0	0	0	0	0	0	1	1
17	GW	Garden Warbler	Sylvia borin	0	0	0	0	0	0	0	0	0	0
17	BC	Blackcap	Sylvia atricapilla	0	0	0	0	0	0	0	0	0	0
17	LW	Lesser Whitethroat	Sylvia curruca	1	1	0	0	0	0	0	0	1	0
17	IW	Bonelliâ€™s Warbler	Phylloscopus bonelli	0	0	0	0	0	0	0	0	0	0
17	CC	Chiffchaff	Phylloscopos collybita	0	0	0	0	0	0	0	0	0	0
17	GC	Goldcrest	Regulus regulus	0	0	0	0	0	0	0	0	0	0
17	FC	Firecrest	Regulus ignicapillus	0	0	0	0	0	0	0	0	0	0
17	CT	Coal Tit	Periparus ater	0	0	0	0	0	0	0	0	0	0
17	BT	Blue Tit	Cyanistes caeruleus	0	0	0	0	0	0	0	0	0	0
17	CI	Crested Tit	Lophophanes cristatus	0	0	0	0	0	0	0	0	0	0
17	WT	Willow Tit	Poeciles montanus	0	0	0	0	0	0	0	0	0	0
17	LT	Long-tailed Tit	Aegithalos caudatus	0	0	0	0	0	0	0	0	0	0
17	NH	Nuthatch	Sitta europeae	0	0	0	0	0	0	0	0	1	0
17	WA	Wallcreeper	Tichodroma muraria	0	0	0	0	0	0	0	0	0	0
17	TC	Treecreeper	Certhia familiaris	0	0	0	0	0	0	0	0	1	0
17	RS	Red-backed Shrike	Lanius collurio	1	2	0	0	0	0	0	0	0	0
17	J	Jay	Garrulus glandarius	0	0	0	0	0	0	0	0	0	0
17	NC	Nutcracker	Nucifraga caryocatactes	0	0	0	0	0	0	0	0	1	0
17	CG	Chough	Pyrrhocorax pyrrhocorax	0	0	0	0	1	0	0	0	0	0
17	AC	Alpine Chough	Pyrrhocorax gracilis	0	0	0	0	1	0	0	0	0	0
17	C	Crow	Corvus corone	1	0	0	0	0	1	0	0	0	0
17	RN	Raven	Corvus corax	1	0	0	0	2	0	0	0	0	0
17	MN	Snowfinch	Montifringilla nivalis	0	0	0	0	0	0	0	0	0	0
17	CH	Chaffinch	Fringella coelebs	0	0	0	0	0	0	0	0	0	0
17	LI	Linnet	Carduelis cannabina	2	0	0	0	0	0	0	0	0	0
17	LR	Redpoll	Carduelis flammea	0	0	0	0	0	0	0	0	1	0
17	GO	Goldfinch	Carduelis carduelis	1	0	0	0	0	0	0	0	0	0
17	SK	Siskin	Carduelis spinus	0	0	0	0	0	0	0	0	1	0
17	CF	Citril Finch	Carduelis citrinella	0	0	0	0	0	0	0	0	1	0
17	BF	Bullfinch	Pyrrhula pyrrhula	0	0	0	0	0	0	0	0	1	0
17	CR	Crossbill	Loxia curvirostra	0	0	0	0	0	0	0	0	1	0
17	Y	Yellowhammer	Emberiza citrinella	1	1	0	0	0	0	0	0	0	0
17	RU	Rock Bunting	Emberiza cia	1	1	0	0	0	0	0	0	0	0
18	LM	Lammergeier	Gypaetus barbatus	3	0	2	3	3	3	3	3	1	1
18	EA	Golden Eagle	Aquila chrysaetos	2	0	2	3	3	3	3	3	1	1
18	BZ	Buzzard	Buteo buteo	1	0	2	2	2	3	3	1	1	0
18	SH	Sparrowhawk	Accipiter nisus	0	0	2	2	2	2	3	1	1	0
18	K	Kestrel	Falco tinnunculus	2	0	0	1	3	2	3	1	1	0
18	PE	Peregrine falcon	Falco peregrinus	0	0	0	3	3	3	3	3	0	0
18	BG	Black Grouse	Tetrao tetrix	3	3	3	3	3	3	3	0	1	3
18	PT	Ptarmigan	Lagopus muta	0	2	0	3	3	3	3	0	1	3
18	RP	Rock Partridge	Alectoris graeca	3	2	0	3	3	3	3	0	1	3
18	Q	Quail	Coturnix coturnix	3	3	0	3	1	3	1	0	1	2
18	CK	Cuckoo	Cuculus canorus	1	0	2	2	0	0	1	0	1	0
18	SI	Swift	Apus apus	0	0	0	0	0	0	1	0	0	0
18	AS	Alpine Swift	Apus melba	0	0	0	0	0	0	1	0	0	0
18	GS	Greater spotted Woodpecker	Dendrocopos major	0	0	3	2	1	0	0	0	1	0
18	G	Green Woodpecker	Picus viridus	2	0	2	2	1	0	0	0	1	0
18	S	Skylark	Alauda arvensis	3	3	0	3	0	3	2	0	1	0
18	HM	House Martin	Delichon urbica	0	0	0	0	0	0	0	0	0	0
18	CM	Crag Martin	Ptyonoprogne rupestris	0	0	0	0	0	0	0	0	0	0
18	WI	Water Pipit	Anthus spinoletta	3	1	2	3	0	0	1	0	1	0
18	TP	Tree Pipit	Anthus trivialis	2	1	2	3	0	0	1	0	1	0
18	PW	White Wagtail	Motacilla alba	0	0	0	1	0	0	1	0	0	0
18	GL	Grey Wagtail	Motacilla cinerea	0	0	0	1	0	0	3	0	0	0
18	WR	Wren	Troglodytes troglodytes	0	0	2	2	1	0	0	0	1	0
18	DI	Dipper	Cinclus cinclus	0	0	0	0	0	0	3	0	0	0
18	D	Dunnock	Prunella modularis	0	0	2	3	1	0	0	0	1	0
18	AA	Alpine Accentor	Prunella collaris	0	0	0	3	3	0	0	0	1	0
18	R	Robin	Erithacus rubecula	0	0	3	3	1	0	0	0	1	0
18	BX	Black Redstart	Phoenicurus ochruros	0	0	0	1	0	0	0	1	0	0
18	W	Wheatear	Oenanthe oenanthe	1	3	0	3	3	0	0	1	1	0
18	WH	Whinchat	Saxicola rubetra	3	3	0	3	3	0	0	0	1	0
18	RO	Rock Thrush	Monticola saxatilis	2	1	0	3	3	0	0	0	1	0
18	ST	Song Thrush	Turdus philomelos	0	0	3	3	3	3	0	0	1	0
18	M	Mistle Thrush	Turdus viscivorus	0	0	3	3	3	3	0	0	1	0
18	FF	Fieldfare	Turdus pilaris	2	0	3	3	3	3	0	0	1	1
18	B	Blackbird	Turdus merula	0	0	3	1	2	0	0	0	1	0
18	RZ	Ring Ouzel	Turdus torquatus	2	0	3	3	2	0	0	0	1	3
18	GW	Garden Warbler	Sylvia borin	0	1	1	3	2	0	0	0	1	1
18	BC	Blackcap	Sylvia atricapilla	0	1	1	3	1	0	0	0	1	0
18	LW	Lesser Whitethroat	Sylvia curruca	0	1	0	3	2	0	0	0	1	1
18	IW	Bonelliâ€™s Warbler	Phylloscopus bonelli	0	0	3	3	2	0	0	0	3	1
18	CC	Chiffchaff	Phylloscopos collybita	0	1	2	3	2	0	0	0	3	0
18	GC	Goldcrest	Regulus regulus	0	0	3	3	2	0	0	0	3	0
18	FC	Firecrest	Regulus ignicapillus	0	0	3	2	2	0	0	0	3	0
18	CT	Coal Tit	Periparus ater	0	0	3	3	2	0	0	0	3	0
18	BT	Blue Tit	Cyanistes caeruleus	0	0	2	2	2	0	0	0	3	0
18	CI	Crested Tit	Lophophanes cristatus	0	0	3	2	2	0	0	0	3	0
18	WT	Willow Tit	Poeciles montanus	0	0	3	3	2	0	0	0	3	0
18	LT	Long-tailed Tit	Aegithalos caudatus	0	0	2	2	1	0	0	0	3	0
18	NH	Nuthatch	Sitta europeae	0	0	3	3	2	0	0	0	3	0
18	WA	Wallcreeper	Tichodroma muraria	0	0	0	1	3	0	0	3	0	0
18	TC	Treecreeper	Certhia familiaris	0	0	3	3	2	0	0	0	3	0
18	RS	Red-backed Shrike	Lanius collurio	3	3	0	3	3	0	2	0	1	3
18	J	Jay	Garrulus glandarius	0	0	3	3	2	0	0	0	3	0
18	NC	Nutcracker	Nucifraga caryocatactes	0	0	3	3	3	0	0	0	3	0
18	CG	Chough	Pyrrhocorax pyrrhocorax	0	0	0	2	3	0	0	0	1	0
18	AC	Alpine Chough	Pyrrhocorax gracilis	0	0	0	2	0	0	0	0	1	0
18	C	Crow	Corvus corone	1	0	0	0	0	0	0	0	1	0
18	RN	Raven	Corvus corax	0	0	0	1	0	0	0	0	1	0
18	MN	Snowfinch	Montifringilla nivalis	0	0	0	1	2	0	0	0	1	0
18	CH	Chaffinch	Fringella coelebs	0	0	2	2	1	0	0	0	2	0
18	LI	Linnet	Carduelis cannabina	0	1	1	3	1	0	0	0	2	1
18	LR	Redpoll	Carduelis flammea	0	0	2	3	1	0	0	0	2	1
18	GO	Goldfinch	Carduelis carduelis	2	0	0	1	0	0	0	0	1	1
18	SK	Siskin	Carduelis spinus	0	0	3	3	3	0	0	0	3	0
18	CF	Citril Finch	Carduelis citrinella	0	0	3	3	3	0	0	0	3	1
18	BF	Bullfinch	Pyrrhula pyrrhula	0	0	3	3	3	0	0	0	3	0
18	CR	Crossbill	Loxia curvirostra	0	0	3	3	3	0	0	0	3	0
18	Y	Yellowhammer	Emberiza citrinella	3	3	0	3	3	0	0	0	1	1
18	RU	Rock Bunting	Emberiza cia	1	1	0	3	2	0	0	0	1	1
19	LM	Lammergeier	Gypaetus barbatus	1	0	0	3	2	0	3	0	0	0
19	EA	Golden Eagle	Aquila chrysaetos	1	0	0	2	2	0	3	0	0	0
19	BZ	Buzzard	Buteo buteo	1	0	0	0	0	0	3	0	0	0
19	SH	Sparrowhawk	Accipiter nisus	0	0	1	0	0	0	2	0	0	0
19	K	Kestrel	Falco tinnunculus	1	0	0	0	0	0	2	0	0	0
19	PE	Peregrine falcon	Falco peregrinus	0	0	0	1	2	0	2	0	0	0
19	BG	Black Grouse	Tetrao tetrix	2	2	2	3	3	1	3	0	0	3
19	PT	Ptarmigan	Lagopus muta	1	1	0	3	3	1	3	0	0	3
19	RP	Rock Partridge	Alectoris graeca	2	0	0	2	1	1	3	0	0	0
19	Q	Quail	Coturnix coturnix	3	1	0	1	0	0	0	0	0	0
19	CK	Cuckoo	Cuculus canorus	1	1	1	0	0	0	0	0	0	0
19	SI	Swift	Apus apus	0	0	0	0	0	0	0	0	0	0
19	AS	Alpine Swift	Apus melba	0	0	0	0	0	0	0	0	0	0
19	GS	Greater spotted Woodpecker	Dendrocopos major	0	0	0	0	0	0	0	0	0	0
19	G	Green Woodpecker	Picus viridus	1	1	1	1	0	0	0	0	0	0
19	S	Skylark	Alauda arvensis	3	1	0	3	0	0	3	0	0	0
19	HM	House Martin	Delichon urbica	0	0	0	0	0	0	0	0	0	0
19	CM	Crag Martin	Ptyonoprogne rupestris	0	0	0	0	0	0	0	0	0	0
19	WI	Water Pipit	Anthus spinoletta	2	2	0	0	0	0	0	0	0	0
19	TP	Tree Pipit	Anthus trivialis	1	2	2	0	0	0	0	0	0	0
19	PW	White Wagtail	Motacilla alba	0	0	0	0	0	0	0	0	0	0
19	GL	Grey Wagtail	Motacilla cinerea	0	0	0	0	0	0	0	0	0	1
19	WR	Wren	Troglodytes troglodytes	0	0	1	0	0	0	0	0	0	0
19	DI	Dipper	Cinclus cinclus	0	0	0	0	0	0	2	0	0	2
19	D	Dunnock	Prunella modularis	0	0	1	0	0	0	0	0	0	0
19	AA	Alpine Accentor	Prunella collaris	1	0	0	0	0	0	2	0	0	0
19	R	Robin	Erithacus rubecula	0	0	1	0	0	0	0	0	0	0
19	BX	Black Redstart	Phoenicurus ochruros	0	0	0	0	0	0	0	0	0	0
19	W	Wheatear	Oenanthe oenanthe	2	1	0	0	0	0	3	0	0	0
19	WH	Whinchat	Saxicola rubetra	3	2	0	2	0	0	2	0	0	1
19	RO	Rock Thrush	Monticola saxatilis	2	1	0	0	0	0	0	0	0	0
19	ST	Song Thrush	Turdus philomelos	1	0	1	0	0	0	0	0	0	1
19	M	Mistle Thrush	Turdus viscivorus	2	0	1	0	0	0	0	0	0	1
19	FF	Fieldfare	Turdus pilaris	2	0	1	0	0	0	0	0	0	2
19	B	Blackbird	Turdus merula	0	0	1	0	0	0	0	0	0	0
19	RZ	Ring Ouzel	Turdus torquatus	2	1	1	0	0	0	0	0	0	3
19	GW	Garden Warbler	Sylvia borin	0	1	1	0	0	0	0	0	0	3
19	BC	Blackcap	Sylvia atricapilla	0	0	1	0	0	0	0	0	0	0
19	LW	Lesser Whitethroat	Sylvia curruca	0	1	1	0	0	0	0	0	0	0
19	IW	Bonelliâ€™s Warbler	Phylloscopus bonelli	0	0	1	0	0	0	0	0	0	0
19	CC	Chiffchaff	Phylloscopos collybita	0	0	1	0	0	0	0	0	0	0
19	GC	Goldcrest	Regulus regulus	0	0	1	0	0	0	0	0	0	0
19	FC	Firecrest	Regulus ignicapillus	0	0	1	0	0	0	0	0	0	0
19	CT	Coal Tit	Periparus ater	0	0	0	0	0	0	0	0	0	0
19	BT	Blue Tit	Cyanistes caeruleus	0	0	0	0	0	0	0	0	0	0
19	CI	Crested Tit	Lophophanes cristatus	0	0	1	0	0	0	0	0	0	0
19	WT	Willow Tit	Poeciles montanus	0	0	1	0	0	0	0	0	0	0
19	LT	Long-tailed Tit	Aegithalos caudatus	0	0	1	0	0	0	0	0	0	0
19	NH	Nuthatch	Sitta europeae	0	0	1	0	0	0	0	0	0	0
19	WA	Wallcreeper	Tichodroma muraria	0	0	0	0	0	0	0	0	0	0
19	TC	Treecreeper	Certhia familiaris	0	0	1	0	0	0	0	0	0	0
19	RS	Red-backed Shrike	Lanius collurio	1	1	1	1	0	0	1	0	0	0
19	J	Jay	Garrulus glandarius	0	0	1	0	0	0	0	0	0	0
19	NC	Nutcracker	Nucifraga caryocatactes	0	0	1	0	0	0	0	0	0	1
19	CG	Chough	Pyrrhocorax pyrrhocorax	2	2	0	1	0	0	2	0	0	0
19	AC	Alpine Chough	Pyrrhocorax graculus	2	2	0	0	0	0	0	0	0	0
19	C	Crow	Corvus corone	2	0	0	0	0	0	0	0	0	0
19	RN	Raven	Corvus corax	2	0	0	0	0	0	0	0	0	0
19	MN	Snowfinch	Montifringilla nivalis	0	1	0	0	0	0	0	0	0	2
19	CH	Chaffinch	Fringella coelebs	0	0	0	0	0	0	0	0	0	0
19	LI	Linnet	Carduelis cannabina	2	2	0	0	0	0	0	0	0	0
19	LR	Redpoll	Carduelis flammea	0	0	1	0	0	0	0	0	0	0
19	GO	Goldfinch	Carduelis carduelis	0	0	0	0	0	0	0	0	0	0
19	SK	Siskin	Carduelis spinus	0	0	1	0	0	0	0	0	0	0
19	CF	Citril Finch	Carduelis citrinella	2	2	1	0	0	0	0	0	0	2
19	BF	Bullfinch	Pyrrhula pyrrhula	0	0	1	0	0	0	0	0	0	2
19	CR	Crossbill	Loxia curvirostra	0	0	1	0	0	0	0	0	0	0
19	Y	Yellowhammer	Emberiza citrinella	3	1	0	0	0	0	0	0	0	0
19	RU	Rock Bunting	Emberiza cia	2	1	0	0	0	0	0	0	0	0
